# Supplementary material
Source: publisher figshare collection journal article supplement (https://gsapubs.figshare.com/articles/dataset/_/25360345)
Supplement: Supplementary file 1 [file 44917213]

Li, G., Wang, X., Yang, H., Jin, M., Qin, C., Wang, Y., Jonell, T.N., Pan, L., Chen, C., Zhao, W., Zhang, X., and Madsen, D.B., 2024, Asynchronous Holocene lake evolution in arid mid-latitude Asia is driven by glacial meltwater and variations in Westerlies and the East Asian summer monsoon: *GSA Bulletin*, <https://doi.org/10.1130/B37288.1>

## Supplemental Material

**Supplemental Text S1.** Luminescence dating: sample preparation and analytical facilities.

**Supplemental Text S2.** Quartz OSL dating, single aliquot and single grain K-feldspar pIRIR dating measurement, and dose rate determination

**Figure S1.** The photograph of paleolake shorelines sections from Aibi Lake Basin.

**Figure S2.** Luminescence characteristics of quartz samples from the Aibi Lake Basin: (a) decay curve for quartz sample AB18-3-45; and (b), (c), (d) OSL IR depletion ratios, the recycling ratios, and the recuperation of the natural signals for all 35 quartz samples from the Aibi Lake Basin.

**Figure S3.** Plots of ranked individual  $D_e$  distributions (top row) against to their intrinsic brightness increasing for five well-bleached shoreline samples. The plot of CAM  $D_e$  values (middle row), and OD values (bottom row) distributions for the grains with brightness above different N-L1 thresholds. The blue line is the N-L1 threshold for 30% brightest grains for each sample.

**Figure S4.** Abanico plots (left) and Kernel Density Estimates (KDEs; right) of all single-grain samples from the shorelines in the Aibi Lake Basin.

**Figure S5.** The reconstructed lake covering area changes of Aibi Lake during past 18 ka.

**Table S1.** Information for samples collected from paleoshorelines in the Aibi Lake Basin.

**Table S2.** Protocol for quartz OSL dating and K-feldspar single-aliquot and single-grain pIRIR dating used for the  $D_e$  measurements of shoreline samples.

**Table S3.** Summary of the residual doses for the IR<sub>50</sub> and pIR<sub>50</sub>IR<sub>170</sub> signals after 28h bleaching under sunlight for the single-aliquot K-feldspar samples from the Aibi Lake Basin shorelines.

**Table S4.** Summary of the single-aliquot pIRIR ages and the single-grain pIRIR CAM ages for the K-feldspar samples from paleoshorelines in the Aibi Lake Basin.

**Table S5.** Summary of accepted grains passing the rejection criteria for K-feldspar samples from the Aibi Lake Basin.

**Table S6.** Summary of single-grain pIRIR dating results for samples from the Aibi Lake Basin.

## **Supplemental Text S1: Luminescence dating: sample preparation and analytical facilities**

A total of 59 luminescence dating samples were prepared in a darkroom under weak red light. Standard heavy liquid separation employing liquids with densities of 2.58 g/cm<sup>3</sup>, 2.62 g/cm<sup>3</sup>, and 2.75 g/cm<sup>3</sup> was used to retrieve and concentrate coarse-grained (>63 μm) quartz and K-feldspar fractions. Quartz fractions were etched using 40 % HF for at least 90 minutes to remove the alpha irradiation layers and any remaining feldspar grains or adhering feldspar. The K-feldspar fractions were etched using 10 % HF for 40 minutes to remove the alpha irradiation layers. Of all 59 samples, 24 samples did not yield quartz fractions, and only nineteen 150–250 μm and sixteen 63–150 μm quartz fractions were retrieved. However, only three pure quartz samples within the 63–90 μm and 90–125 μm fractions were retrieved after purity checks using OSL IR depletion ratio tests (Duller, 2003). A total of ten 63-90 μm, two 90-125μm, one 125-150 μm, six 150-180 μm and forty 180–250 μm K-feldspar samples were retrieved for age determination.

All luminescence measurements were performed on two Risø TL/OSL-DA-20 reader luminescence dating systems (Bøtter-Jensen et al., 2010) at Lanzhou University. A <sup>90</sup>Sr/<sup>90</sup>Y beta source was used for laboratory irradiation and was calibrated for both disc and cup geometry. Quartz OSL signals were stimulated using blue LEDs (470 nm, ~80 mW/cm<sup>2</sup>) and detected using a 7.5 mm of Schott U-340 (UV) glass filter. K-feldspar single-aliquot IR and pIRIR signals were stimulated using IR LEDs (870 nm, ~135 mW/cm<sup>2</sup>), and detected through a Schott BG 39/Corning 7-59 filter combination. Single-grain IR and pIRIR signals were stimulated using IR laser and detected using a BG 39 filter without quartz windows.

## **Supplemental Text S2: Quartz OSL dating, single aliquot and single grain K-feldspar pIRIR dating measurement, and dose rate determination**

A standard single-aliquot regeneration (SAR) protocol was used for the three quartz samples for luminescence characteristics measurements (Murray and Wintle, 2003). A 7–8 mm aliquot size with thousands of grains was used to retrieve a detectable quartz OSL signal. The quartz OSL signal was derived from the first 0.32 s integral of the decay curve minus the early background (0.32–0.96 s) to minimize the influence of interfering medium and slow components (Cunningham & Wallinga, 2010). OSL IR depletion ratio tests were conducted on all 35 quartz samples to check for purity (Duller, 2003).

In order to validate the thermal treatments in the pIRIR dating protocol for the shoreline samples, prior-IR stimulation temperature to  $D_e$  plateau tests were performed on the coarse K-feldspar fraction (180–250  $\mu\text{m}$ ) of sample AB18-7-235 using a 2 mm aliquot. Preheat temperatures from 160 to 240  $^{\circ}\text{C}$  with 20  $^{\circ}\text{C}$  intervals were used for six groups of aliquots (three aliquots in each group, 18 aliquots in total). The pIRIR stimulation was always 30  $^{\circ}\text{C}$  lower than the corresponding preheat temperature. A pIRIR dating protocol using a preheat temperature of 320  $^{\circ}\text{C}$  and a pIRIR stimulation of 290  $^{\circ}\text{C}$  was also tested (i.e., Thiel et al, 2011). An IRSL hot stimulation using a temperature 5  $^{\circ}\text{C}$  higher than the preheat temperature was conducted at the end of each cycle.

In order to check the stability of the pIRIR<sub>170</sub> signal, an anomalous fading test (fading rate or  $g$  value measurements; Aitken, 1985; Auclair et al., 2003) was conducted on coarse-grained K-feldspar sample AB18-6-195. The same dose was given repeatedly with different delay periods (e.g. 0, 0.5, 1, 2, 4, 22, and 175 h) between the end of preheat and the start of the IRSL measurement. The decay in the sensitivity-corrected pIRIR<sub>170</sub> signals as a function of storage

time at room temperature was measured. The calculated  $g$  values were normalized to a measurement time of 2 days after irradiation (Huntley and Lamothe, 2001).

Dose recovery tests were conducted on sunlight bleached samples AB18-1-160 (28 h sunlight bleaching, Nov, 2018, Lanzhou, China) and JH19-4-180 (28 h sunlight bleaching, Nov, 2019, Lanzhou, China) to check the suitability of the single-aliquot pIRIR dating protocol. This protocol utilized a pIR<sub>50</sub>IR<sub>170</sub> signal stimulated at 170°C following an IR stimulation at 50 °C for single-aliquots of the 180–250  $\mu\text{m}$  fractions. Given doses of 122 Gy and 62.8 Gy were added to the sunlight-bleached 180–250  $\mu\text{m}$  K-feldspar samples AB18-1-160 and JH19-4-180, respectively, and were measured as an unknown dose using the protocol in Table S2. In the single-aliquot pIRIR dating protocol, a test dose of at least 30% of the  $D_{\text{e}}$ s was used for sensitivity corrections (Yi et al., 2016). IRSL and pIRIR signals were derived from the integral of the initial 2 s of the decay curves minus the last 49 s background integral. Sunlight bleach tests were conducted on K-feldspar (180–250  $\mu\text{m}$  fractions) for 28 h (4 h each day, 7 days, Nov, 2019, Lanzhou, China) after which the residual doses were measured using the pIRIR dating protocol (Table S3).

For single-grain pIRIR dating, the IR and pIRIR signals were measured on single-grain discs with 300  $\mu\text{m}$  hole diameters using the pIRIR dating protocol (Table S2). Single-grain discs of each K-feldspar sample were randomly checked for the number of grains in each hole under microscope. More than a single-grain per disc hole was rarely observed. IR and pIRIR signals used for  $D_{\text{e}}$  determination were derived by subtracting a background estimated from the last 0.33 s from the first 0.15 s of the decay curve for single-grains.

Dose recovery tests were carried out on 180–250  $\mu\text{m}$  K-feldspar samples AB18-1-65 and JH19-2-120 to check the suitability of the single-grain pIRIR dating protocol. For each sample,

four single-grain aliquots were bleached under sunlight for 28 h. Residual doses for the pIRIR signals of two aliquots for each K-feldspar sample were measured using the single-grain pIRIR dating protocol (Table S2). Dose recovery tests were conducted on the other two bleached aliquots of the single-grain K-feldspar samples using the same dating protocol. Laboratory given doses of 68.82 Gy and 50.68 Gy were added to sample AB18-1-65 and JH19-2-120, respectively. The test dose of 50% of given dose were used for the dose recovery test. The measured residual doses were subtracted from measured pIRIR single-grain  $D_e$ s in the measured/given dose ratio calculations.

External dose rates for quartz and K-feldspar samples were determined by powdering 3–5 g of each sample in preparation for determination of U and Th concentrations by ICP-MS and K content by ICP-OES at Lanzhou University. These concentrations were used to calculate gamma and beta dose rates using the conversion factor of Guérin et al. (2011). Internal dose rates were determined by analyzing the individual K content of 84 K-feldspar grains from eight samples across different shoreline sections by electron microprobe analysis (EMPA). Analytical discs were prepared by affixing individual K-feldspar grains using liquid, quick-hardening resin to the discs. Once dried, discs were then ground to expose grain cross-sections, polished and carbon-coated immediately prior to EMPA to avoid charging during measurement.

The cosmic dose rates of the quartz and K-feldspar samples were calculated using sample altitudes and burial depths (Prescott and Hutton, 1994). The measured water content of shoreline samples is <5 %, while the saturation moisture content of most paleoshoreline samples varied between 10 % and 30 %. The life-time water content of each sample was estimated according to the measured water content and saturation water content changes for shorelines samples due to lake level duration and fluctuation at different locations. The  $D_e$  values and dose rate of quartz

and K-feldspar samples were calculated using the LDAC program v1.0 (Liang and Forman, 2019).

## References

- Aitken, M.J., 1985. Thermoluminescence Dating: London, Academic Press.
- Auclair, M., Lamothe, M., Huot, S., 2003, Measurement of anomalous fading for feldspar IRSL using SAR: Radiation Measurements, v. 37, p. 487–492.
- Bøtter-Jensen, L., Thomsen, K.J, Jain, M., 2010, Review of optically stimulated luminescence (OSL) instrumental developments for retrospective dosimetry: Radiation Measurements, v. 45, p. 253–257.
- Cunningham, A.C., Wallinga, J., 2010, Selection of integration time intervals for quartz OSL decay curves: Quaternary Geochronology, v. 5, p. 657–666.
- Duller, G.A.T., 2003, Distinguishing quartz and feldspar in single grain luminescence measurements: Radiation Measurements, v. 37, p. 161–165.
- Guérin, G., Mercier, N., Adamiec, G., 2011, Dose-rate conversion factors: update: Ancient TL, v. 29, p. 5–8.
- Huntley, D.J., Lamothe, M., 2001, Ubiquity of anomalous fading in K-feldspars and the measurement and correction for it in optical dating: Canadian Journal of Earth Sciences, v. 38, p. 1093–1106.
- Liang, P., Forman, S.L., 2019, LDAC: an Excel-based program for luminescence equivalent dose and burial age calculations: Ancient TL, v. 37, p. 21–40.
- Murray, A.S., Wintle, A.G., 2003, The single aliquot regenerative dose protocol: potential for improvements in reliability: Radiation Measurements, v. 37, p. 377–381.

Prescott, J.R., Hutton, J.T., 1994, Cosmic ray contributions to dose rates for luminescence and ESR dating: large depths and long-term time variations: *Radiation Measurements*, v. 23, p. 497–500.

Thiel, C., Buylaert, J.P., Murray, A.S., Terhorst, B., Hofer, I., Tsukamoto, S., Frechen, M., 2011, Luminescence dating of the Stratzing loess profile (Austria) - Testing the potential of an elevated temperature post-IR IRSL protocol: *Quaternary International*, v. 234, p. 23–31.

Yi, S., Buylaert, J. P., Murray, A. S., Lu, H., Thiel, C., Zeng, L. 2016, A detailed post-IR IRSL dating study of the Niuyangzigou loess site in northeastern China: *Boreas*, v. 45, p. 644–657.

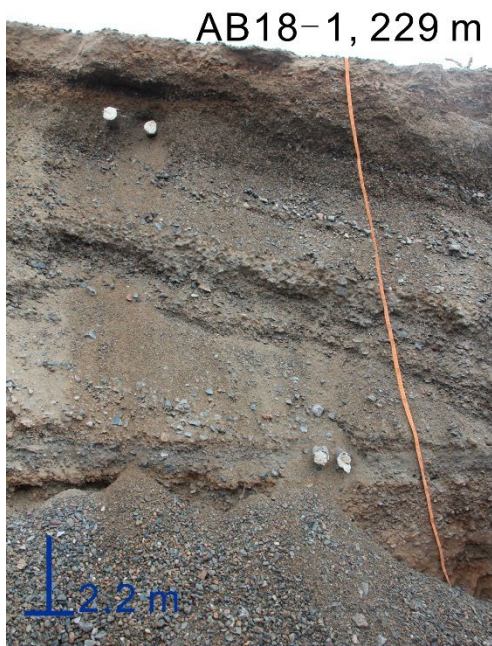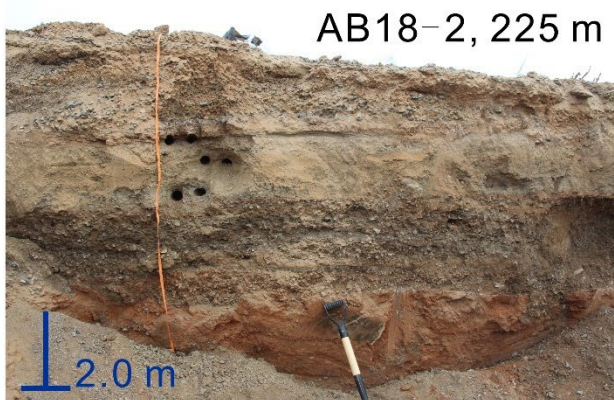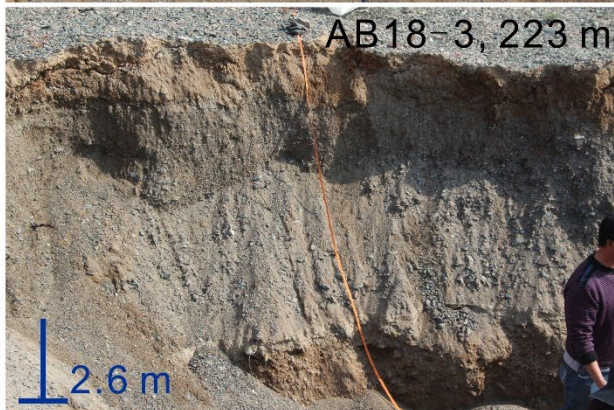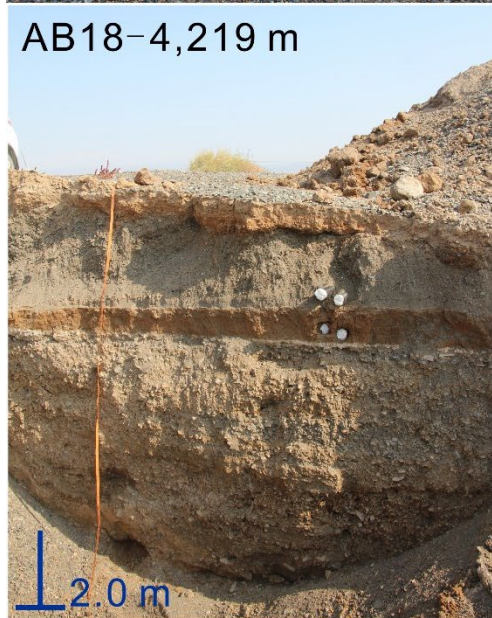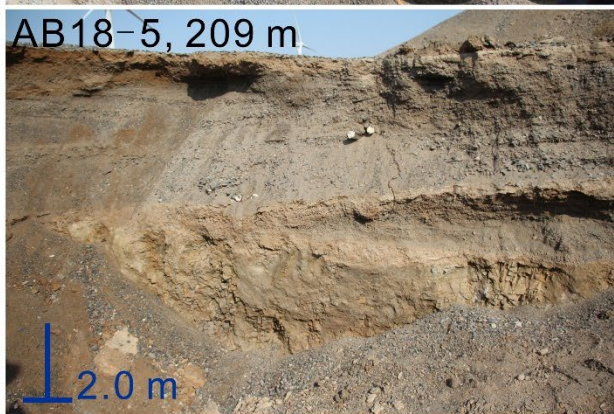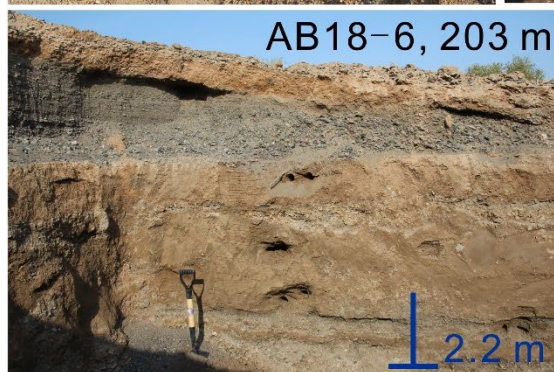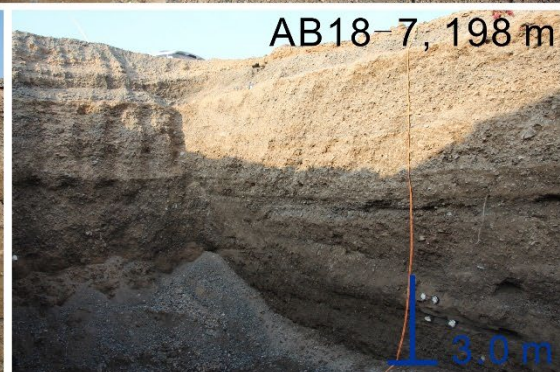



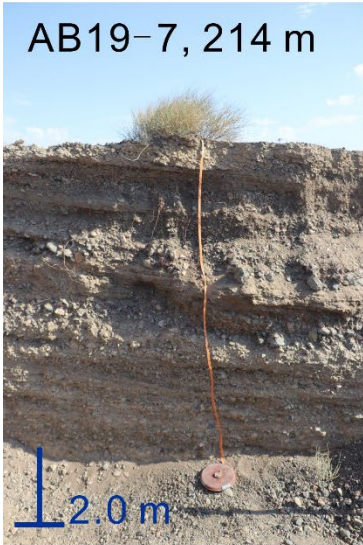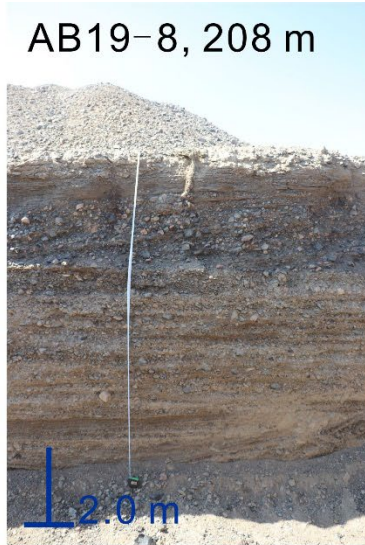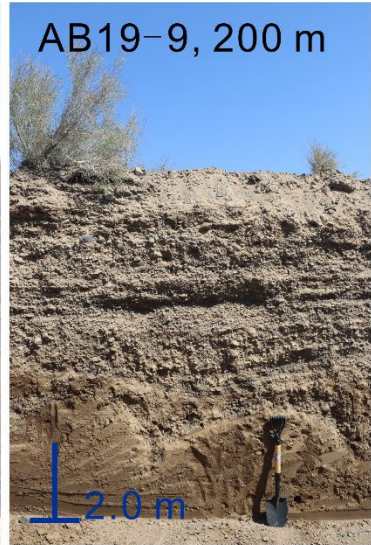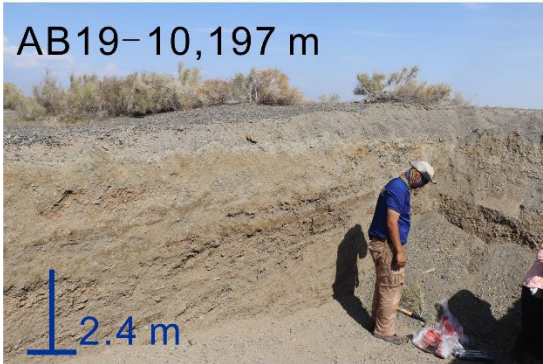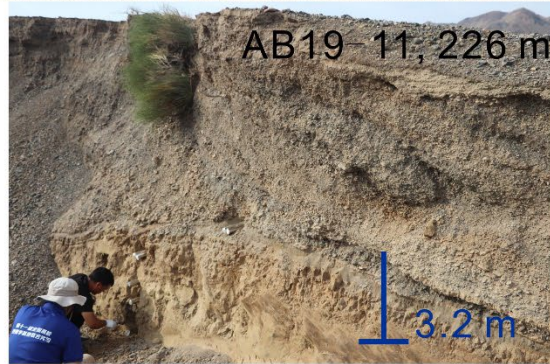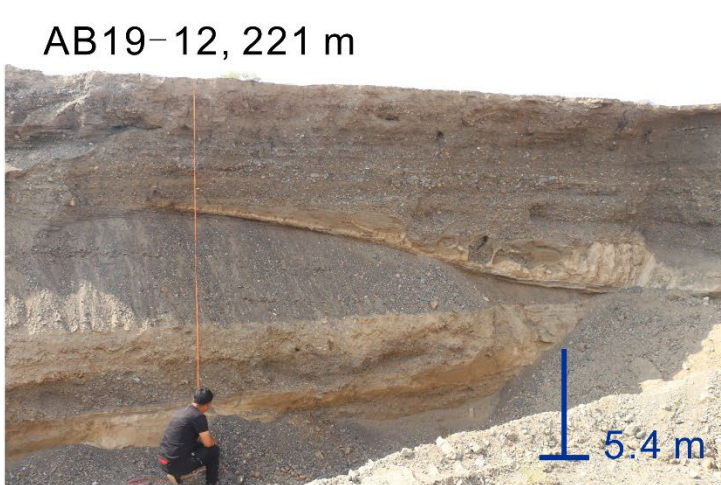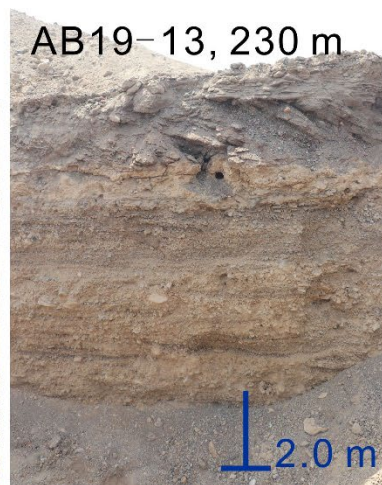

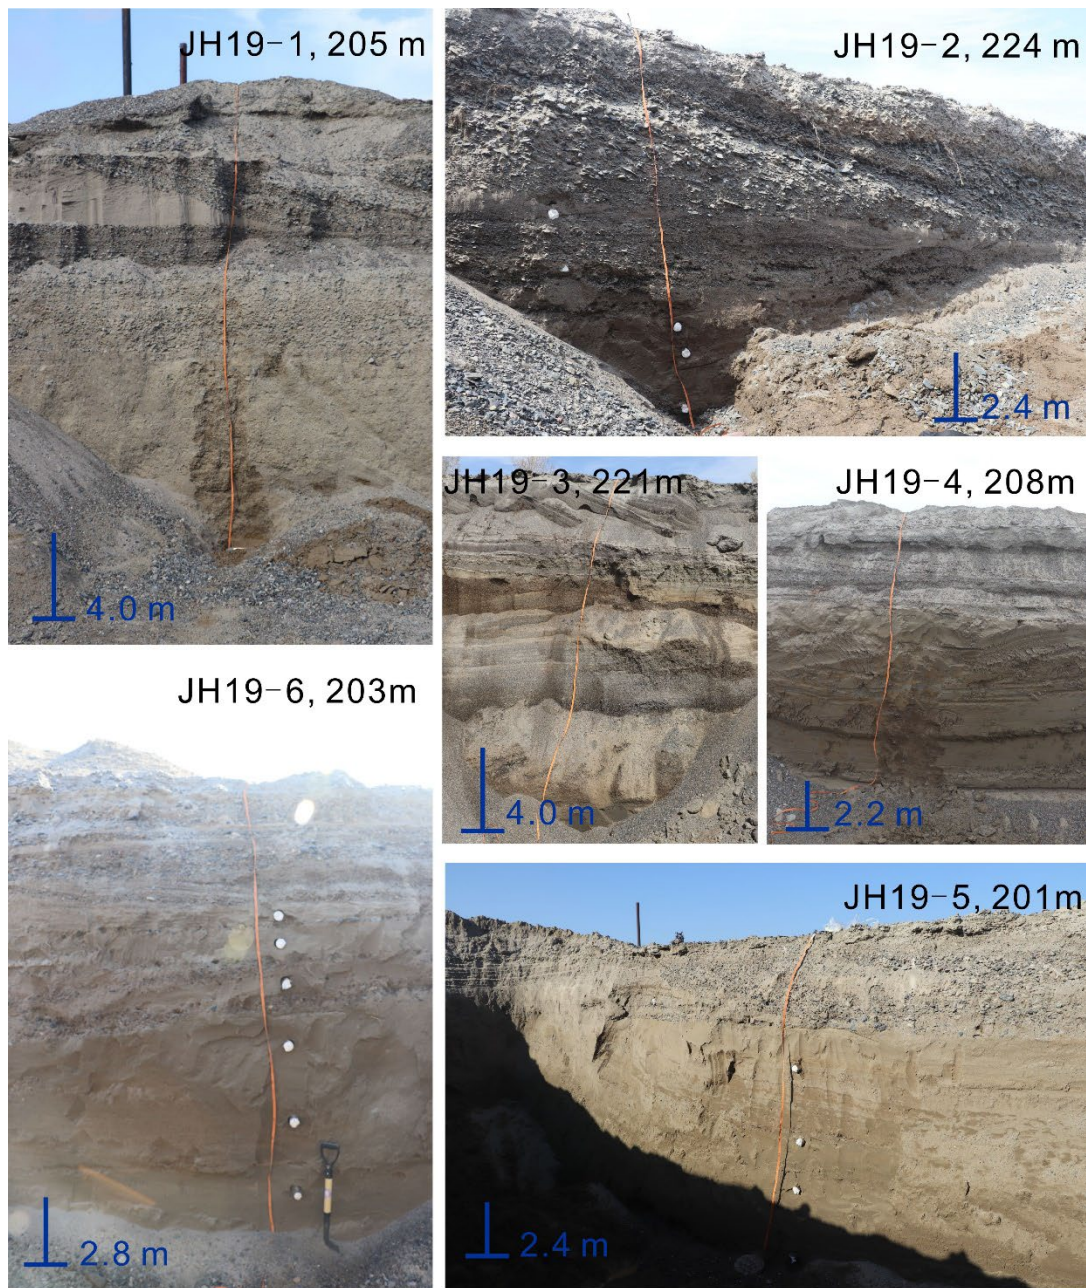

Figure S1. The photograph of paleolake shorelines sections from Aibi Lake Basin.

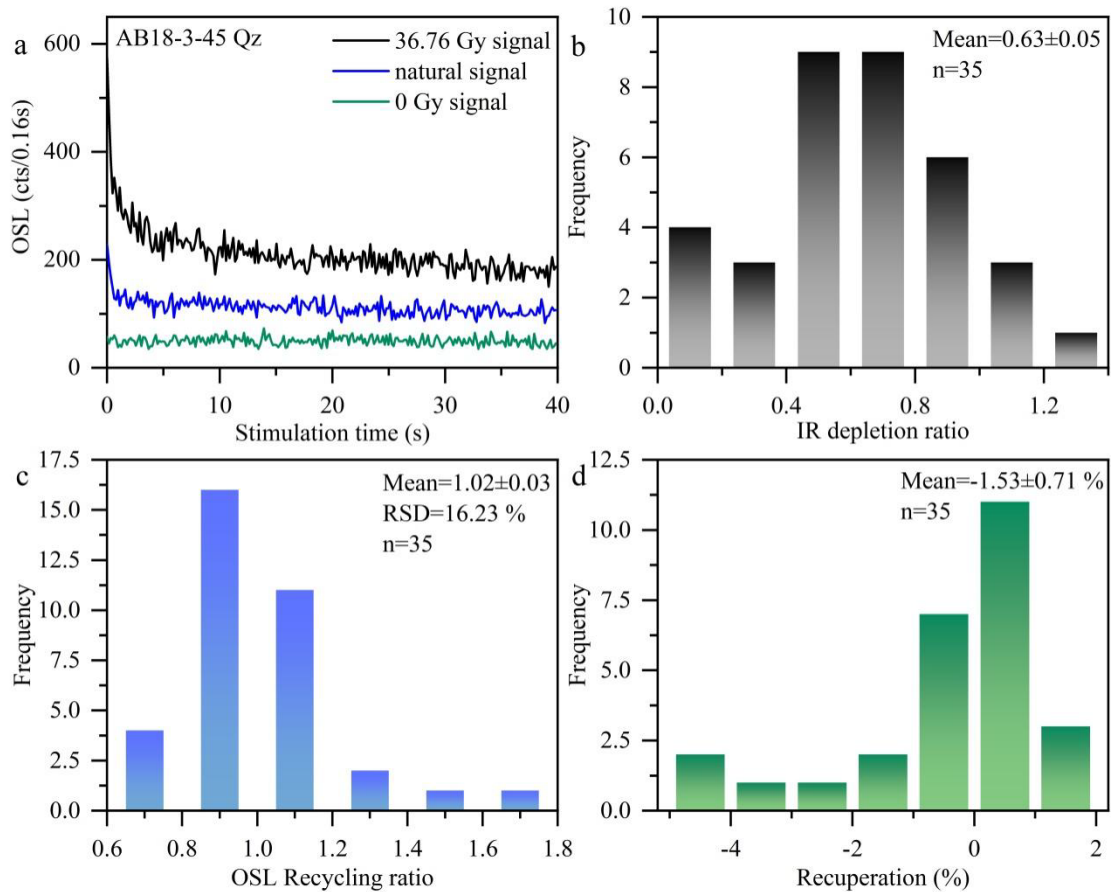

Figure S2. Luminescence characteristics of quartz samples from the Aibi Lake Basin: (a) decay curve for quartz sample AB18-3-45; and (b), (c), (d) OSL IR depletion ratios, the recycling ratios, and the recuperation of the natural signals for all 35 quartz samples from the Aibi Lake Basin.

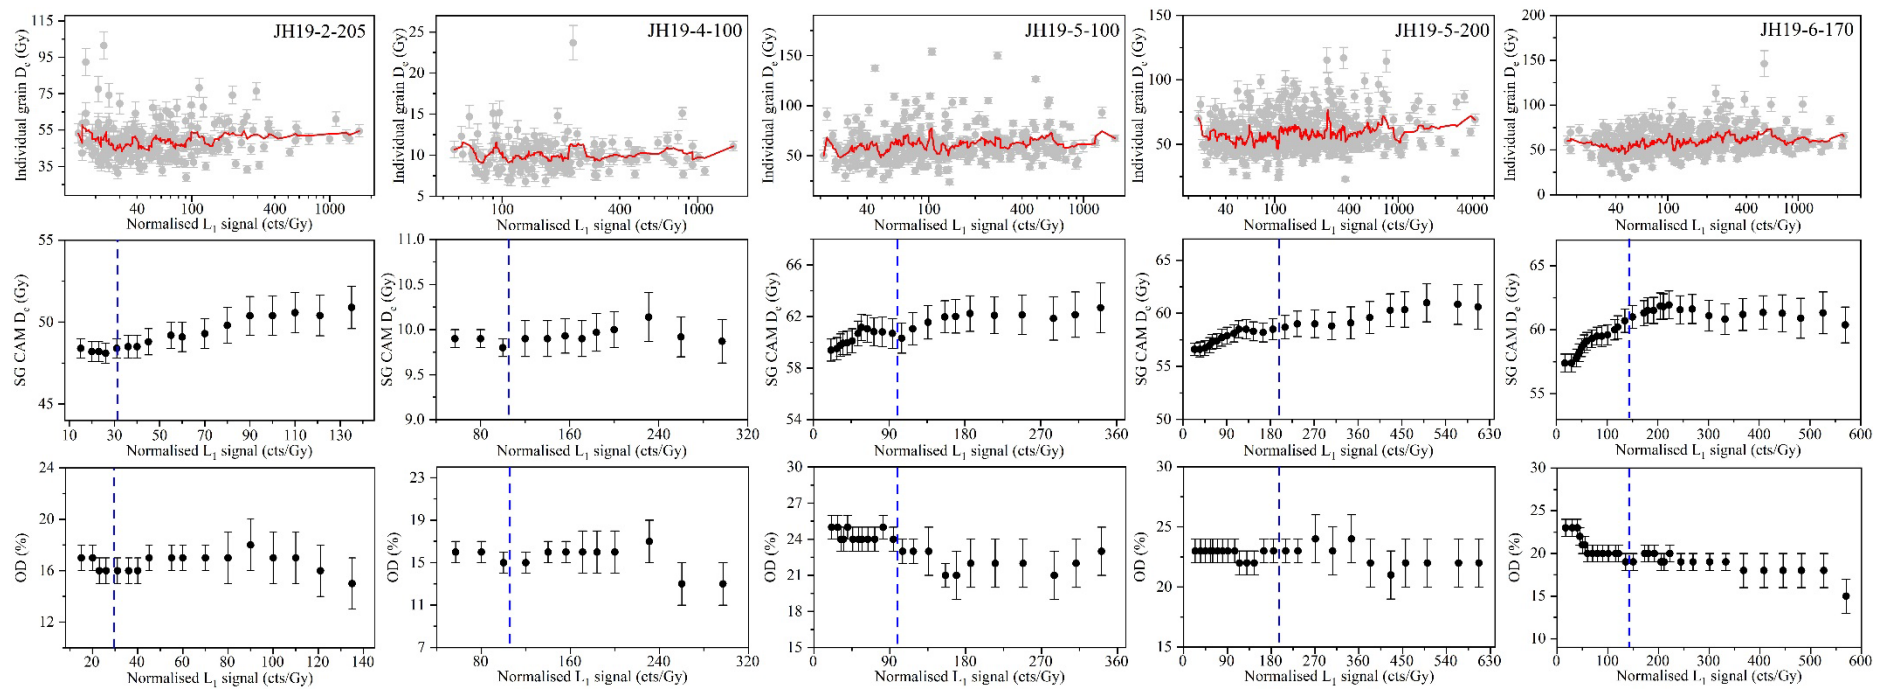

Figure S3. Plots of ranked individual  $D_e$  distributions (top row) against to their intrinsic brightness increasing for five well-bleached shoreline samples. The plot of CAM  $D_e$  values (middle row), and OD values (bottom row) distributions for the grains with brightness above different  $N-L_1$  thresholds. The blue line is the  $N-L_1$  threshold for 30% brightest grains for each sample.

Eolian Sediments (5)

JH19-2-205  
n=165  
OD=17±1%

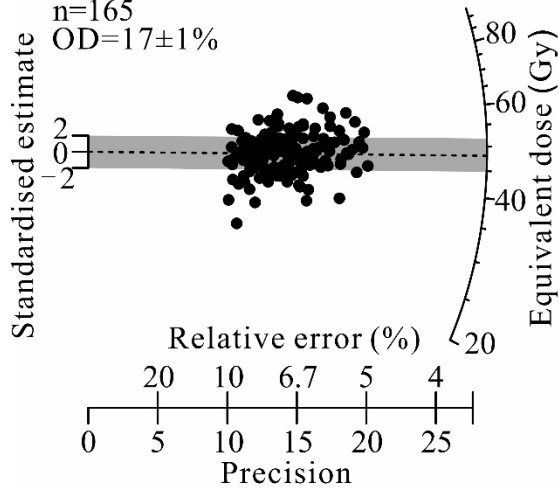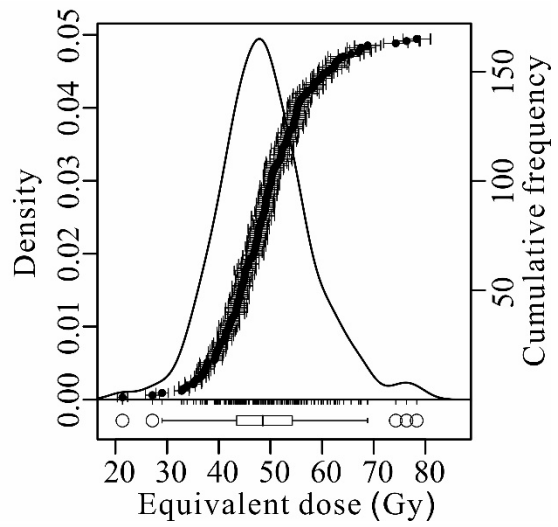

JH19-4-100  
n=121  
OD=15±1%

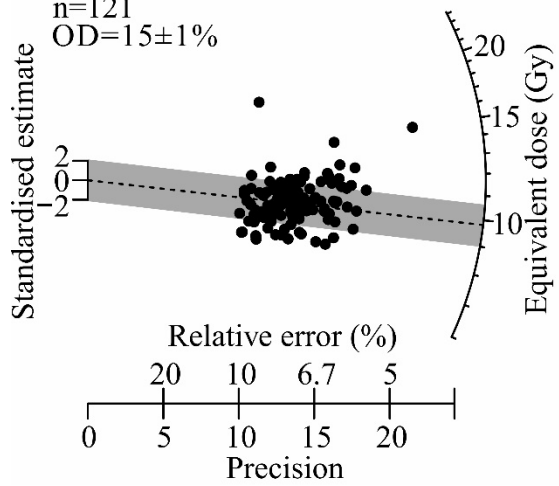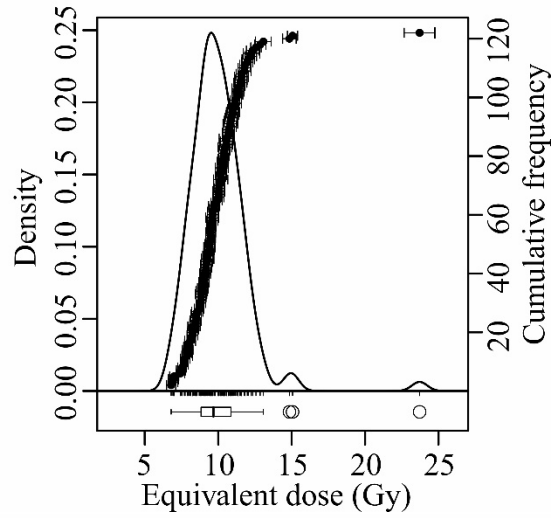

JH19-5-100  
n=165  
OD=24±1%

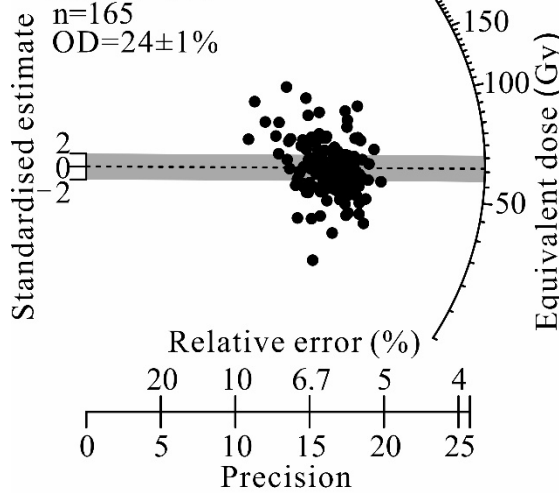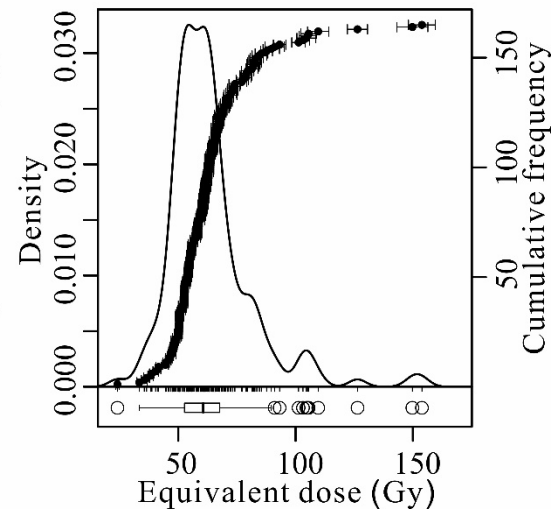

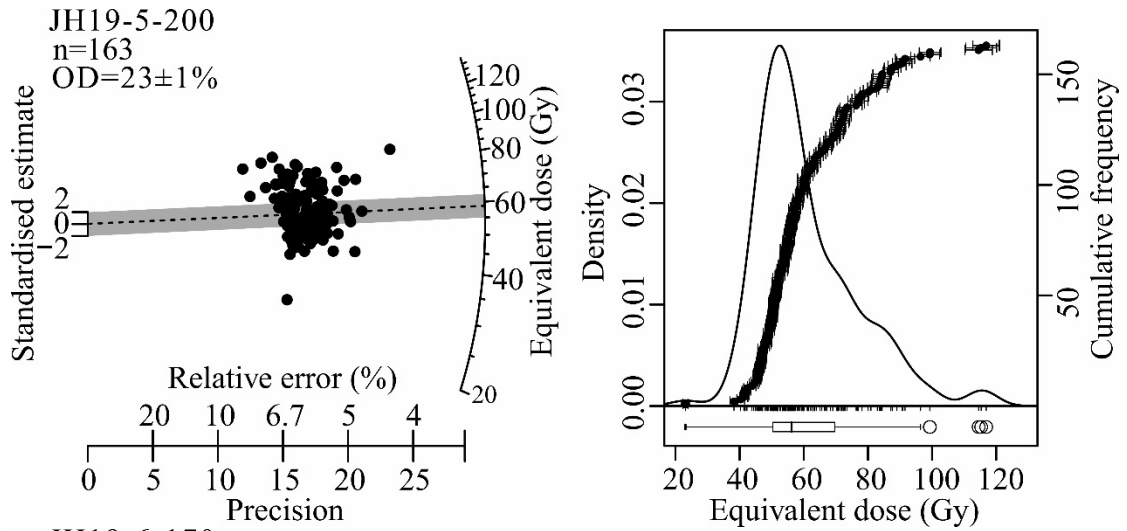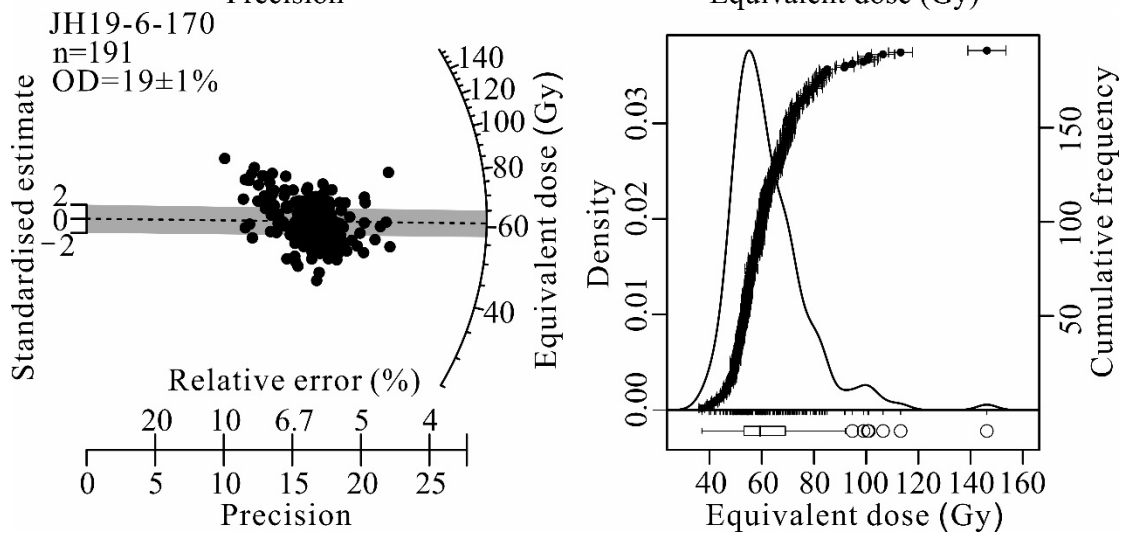

Lake Sediments (39)

AB18-1-65

n=180

OD=33±2%

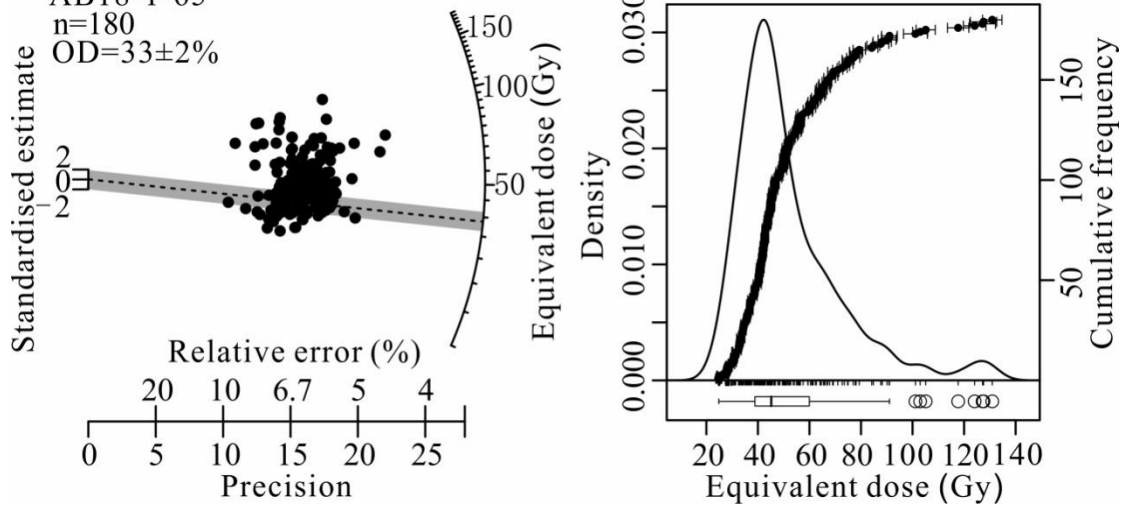

AB18-1-180

n=90

OD=40±3%

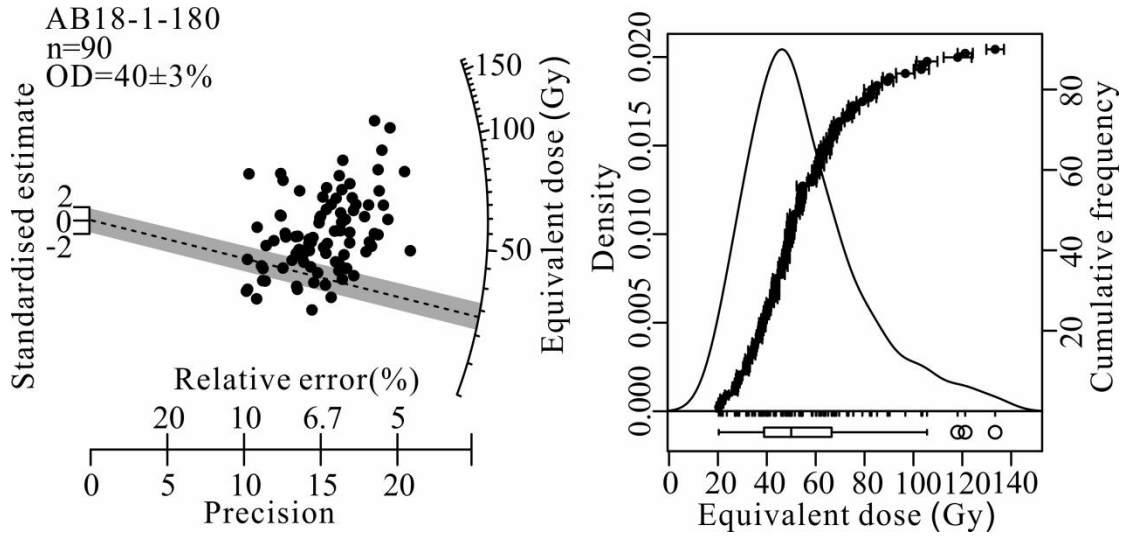

AB18-1-190

n=79

OD=36±3%

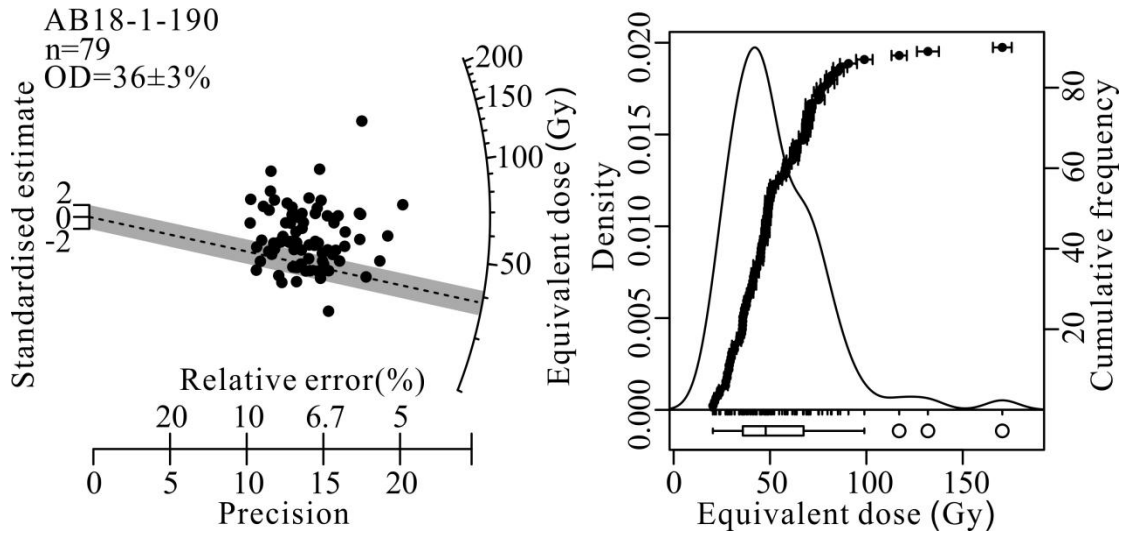

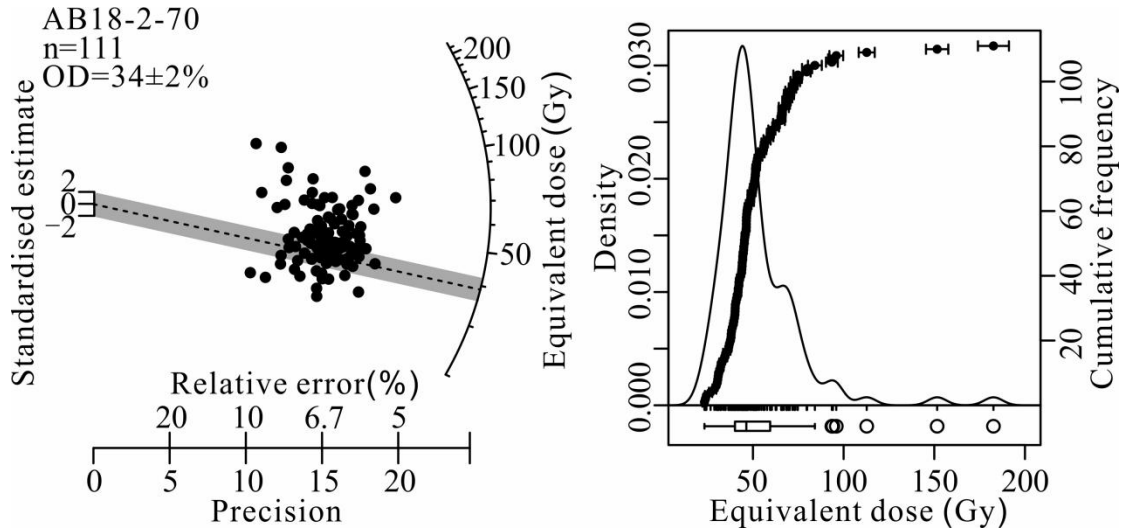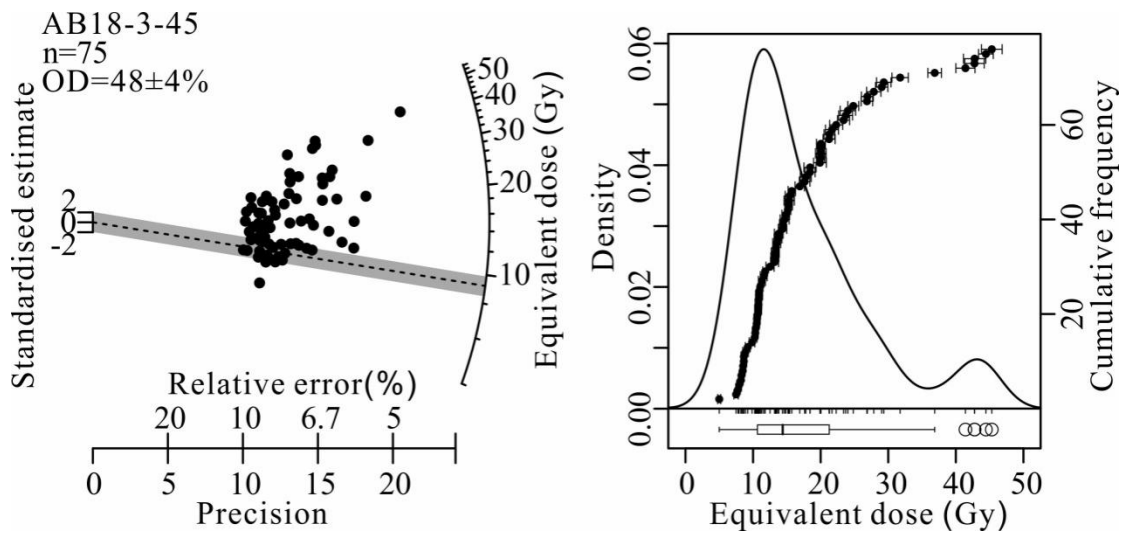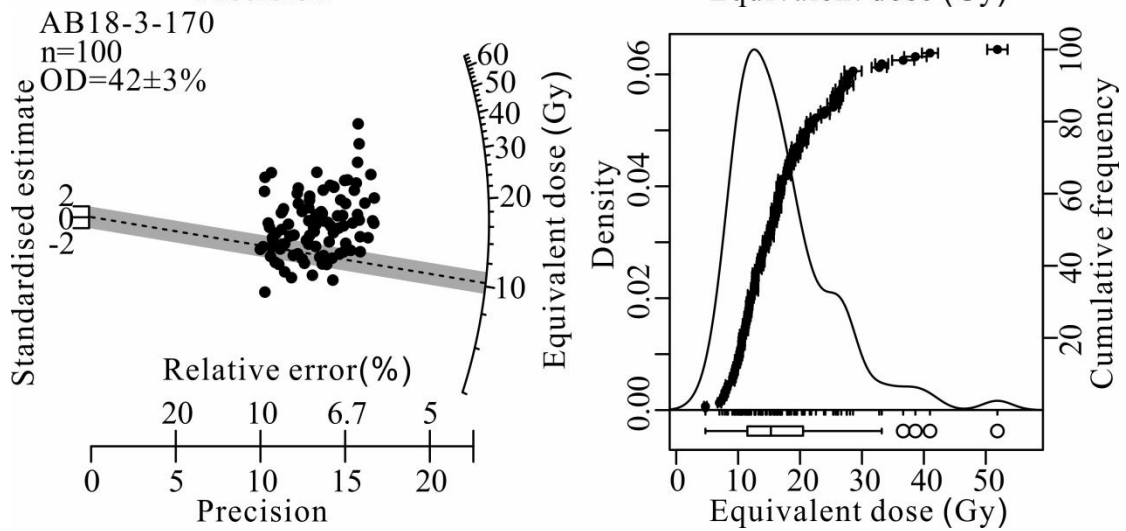



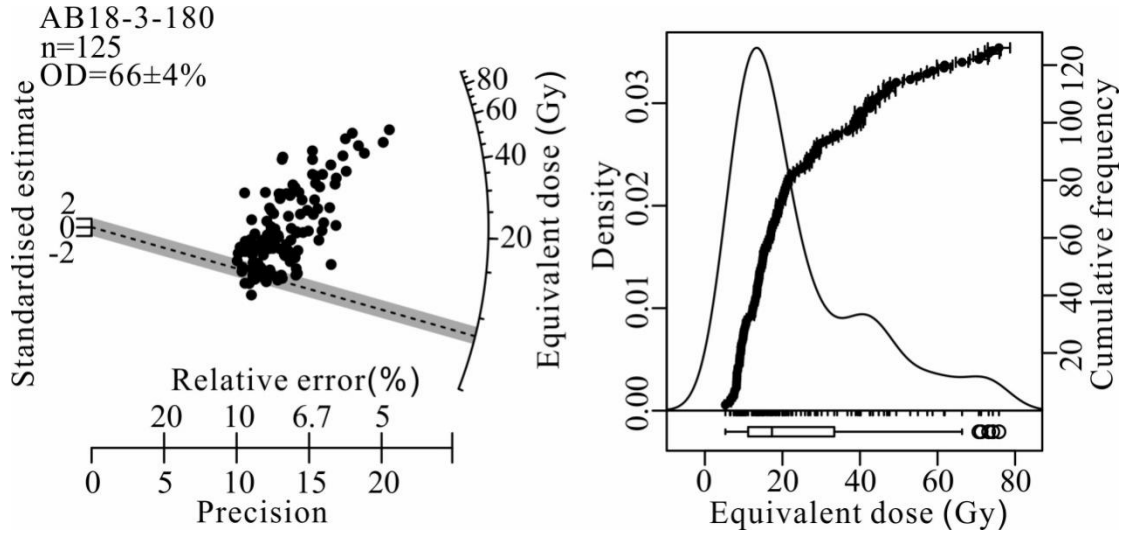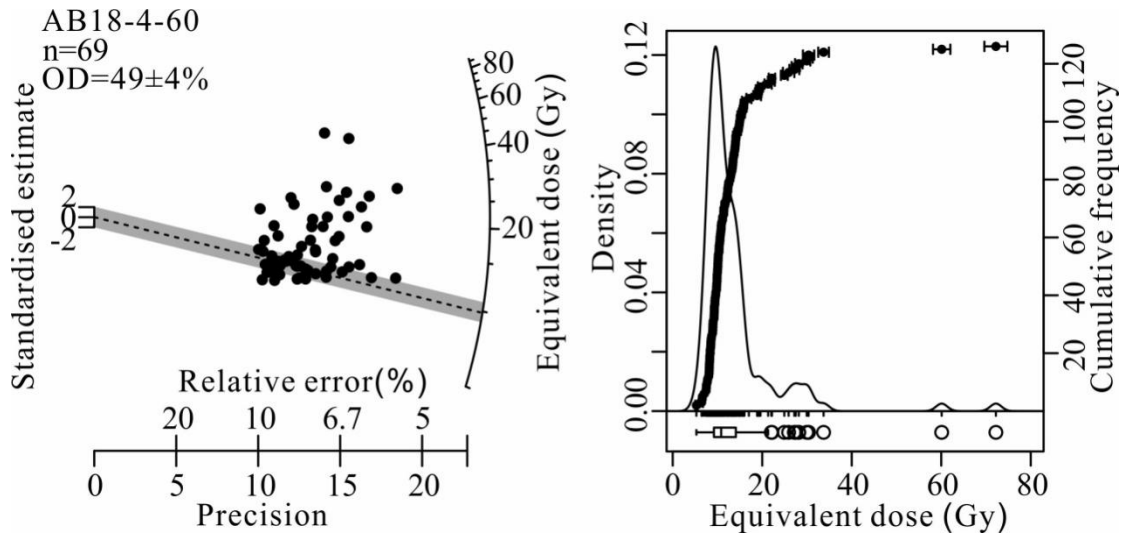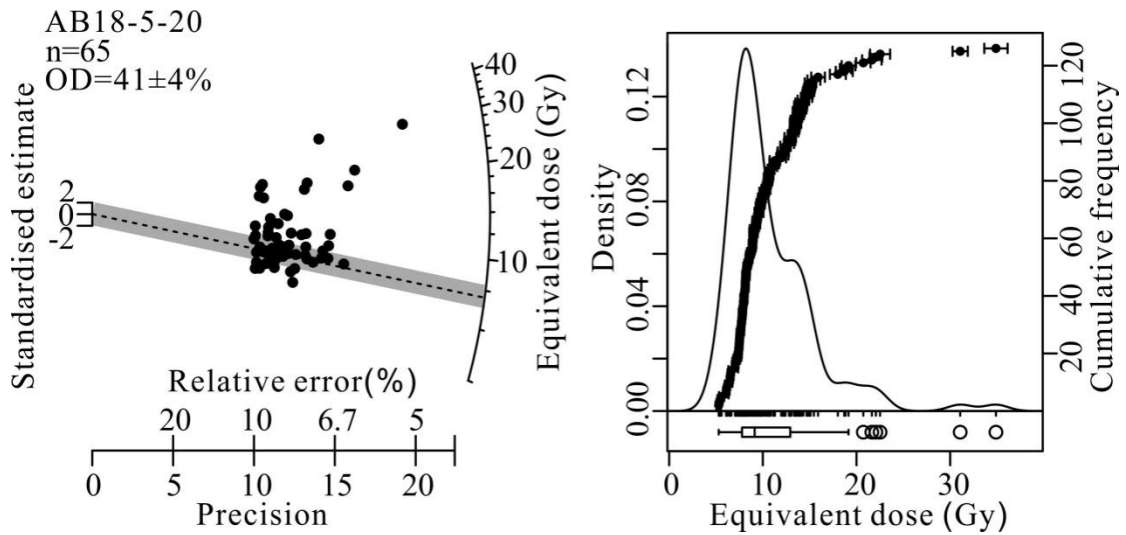

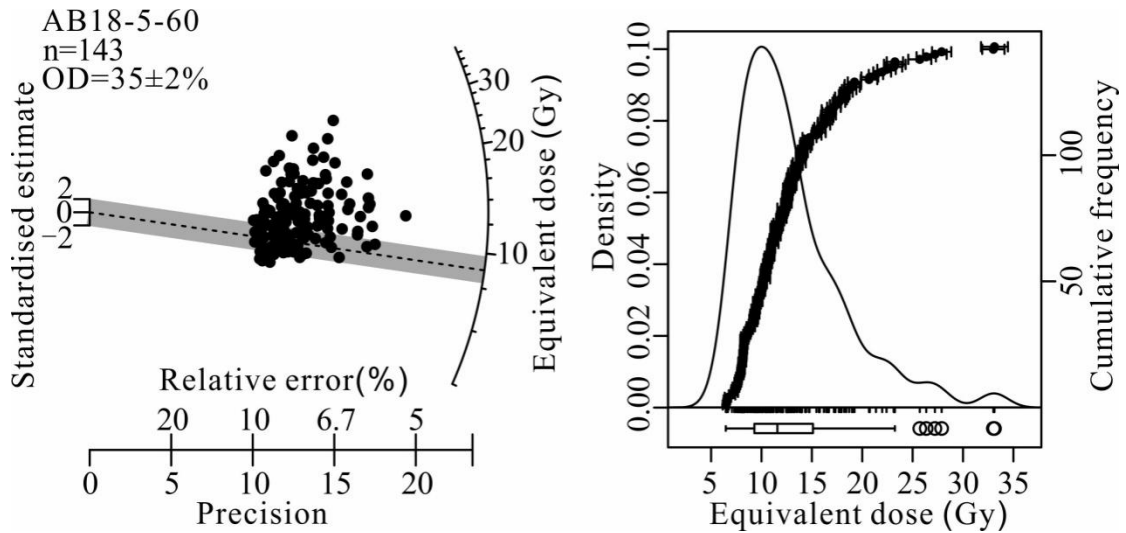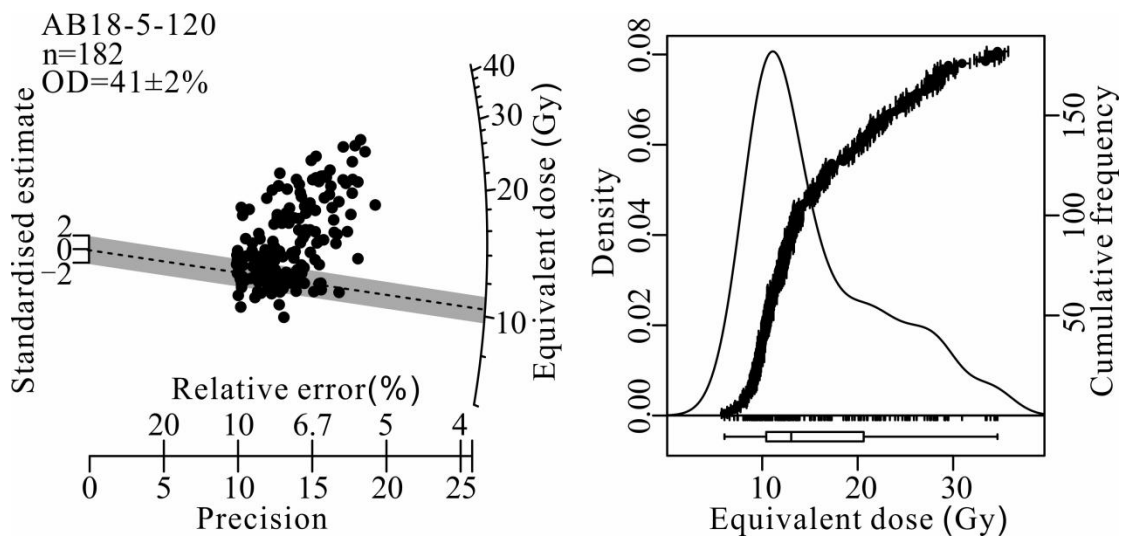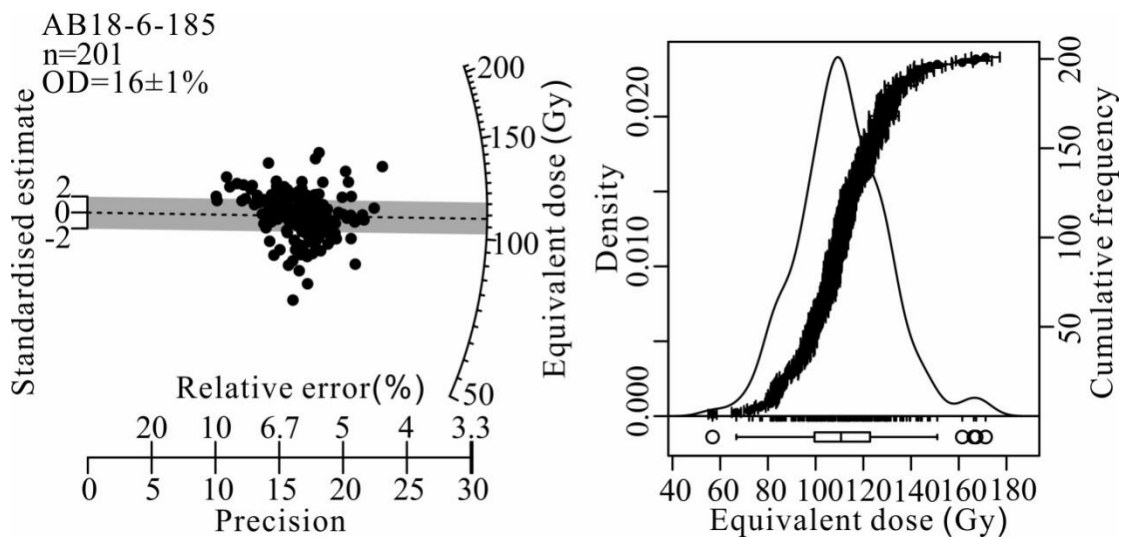

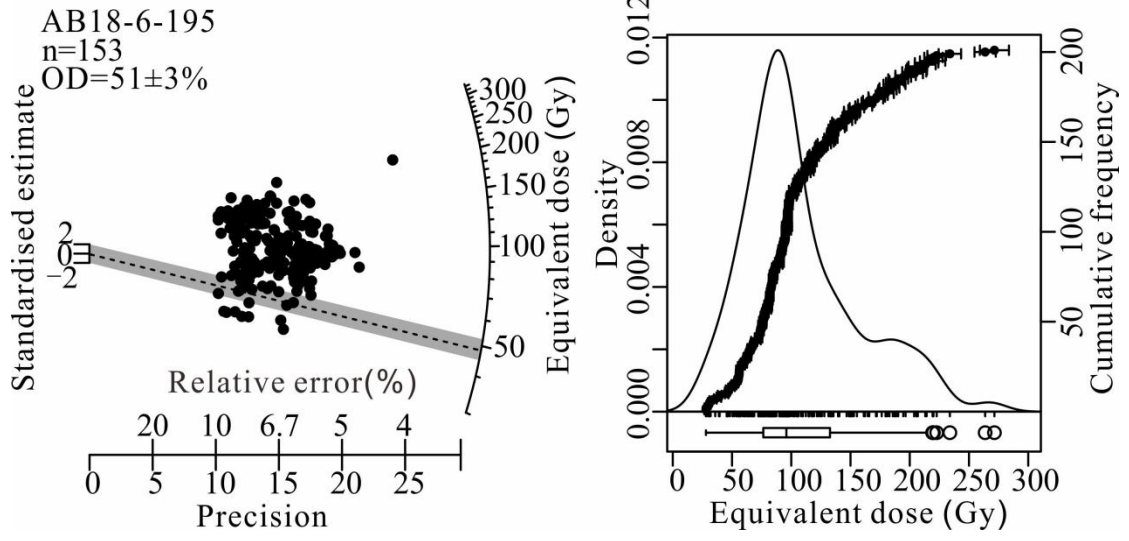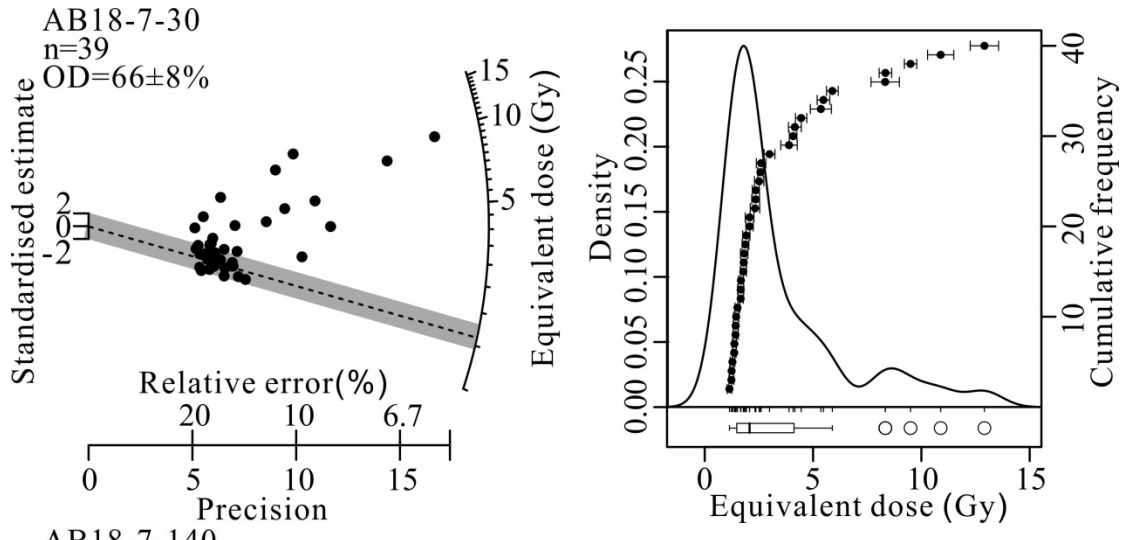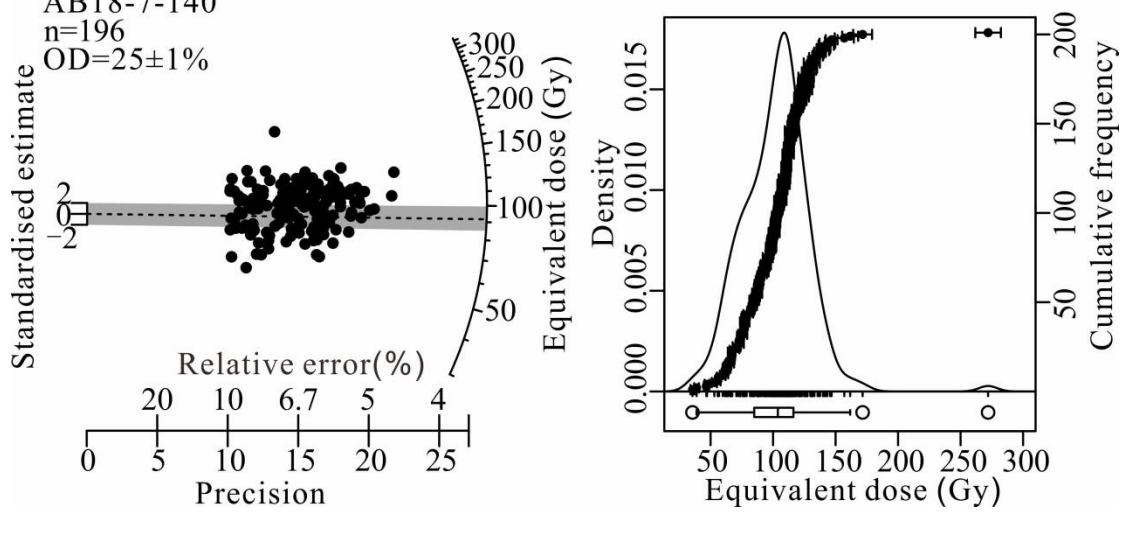

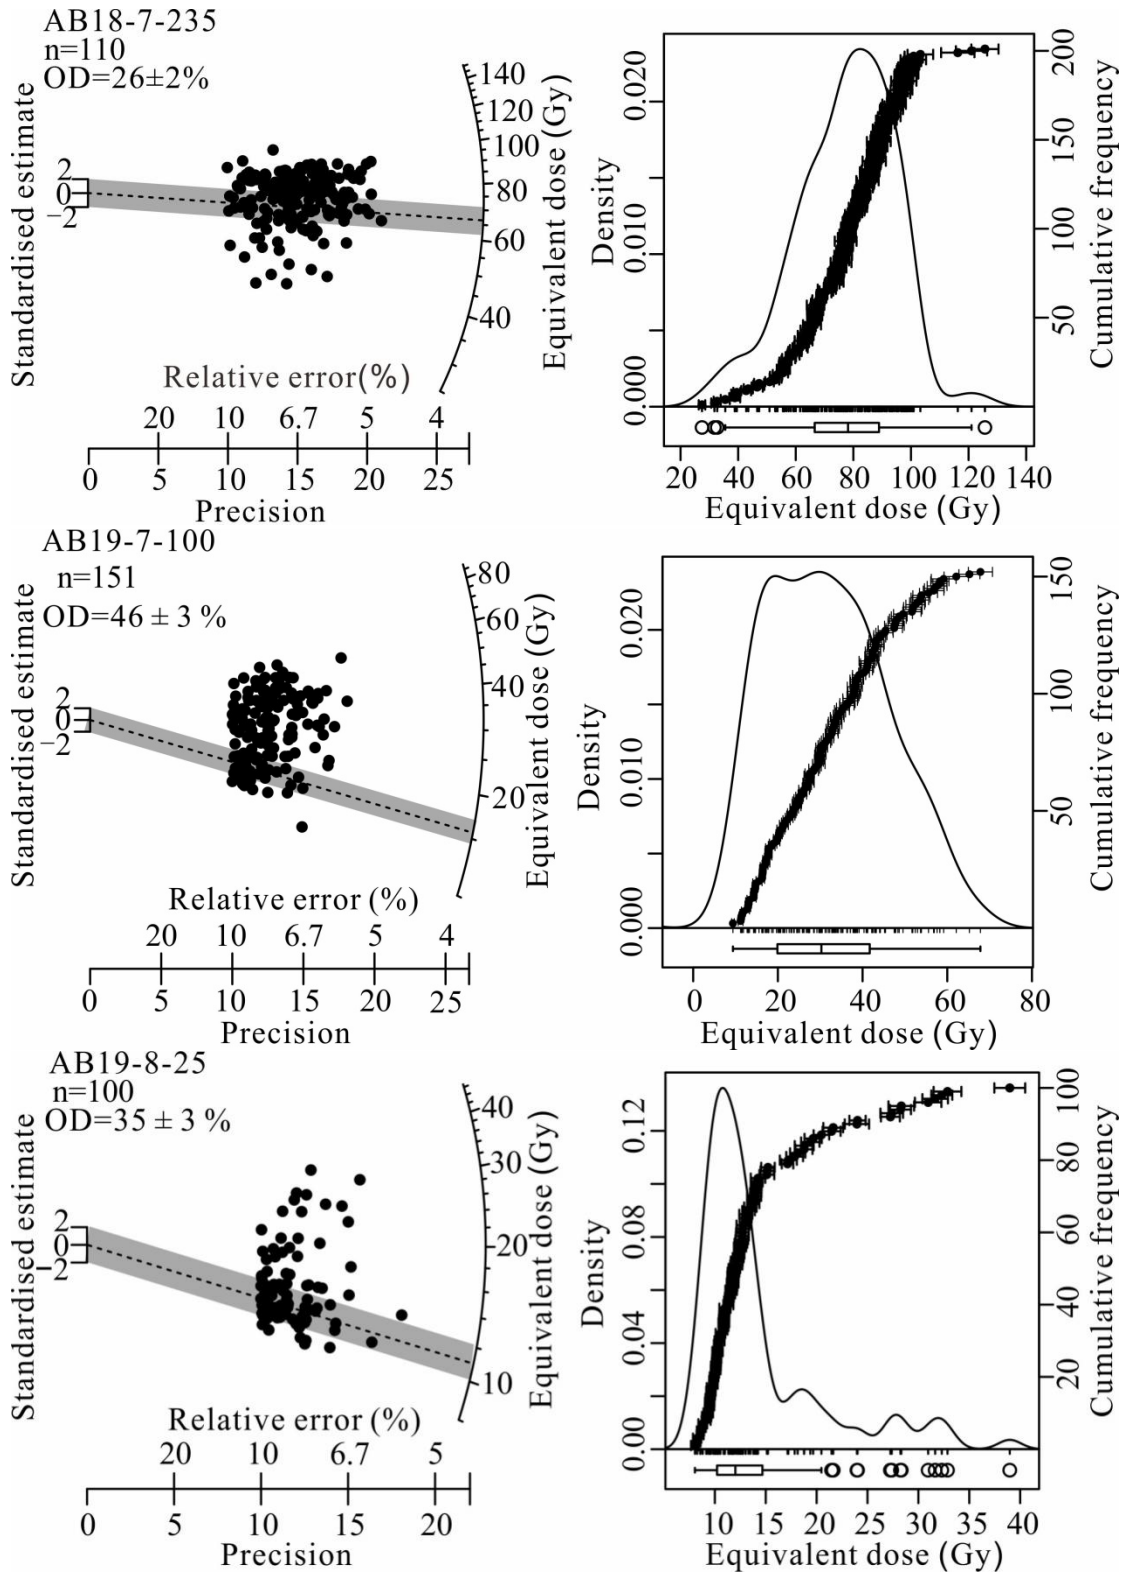

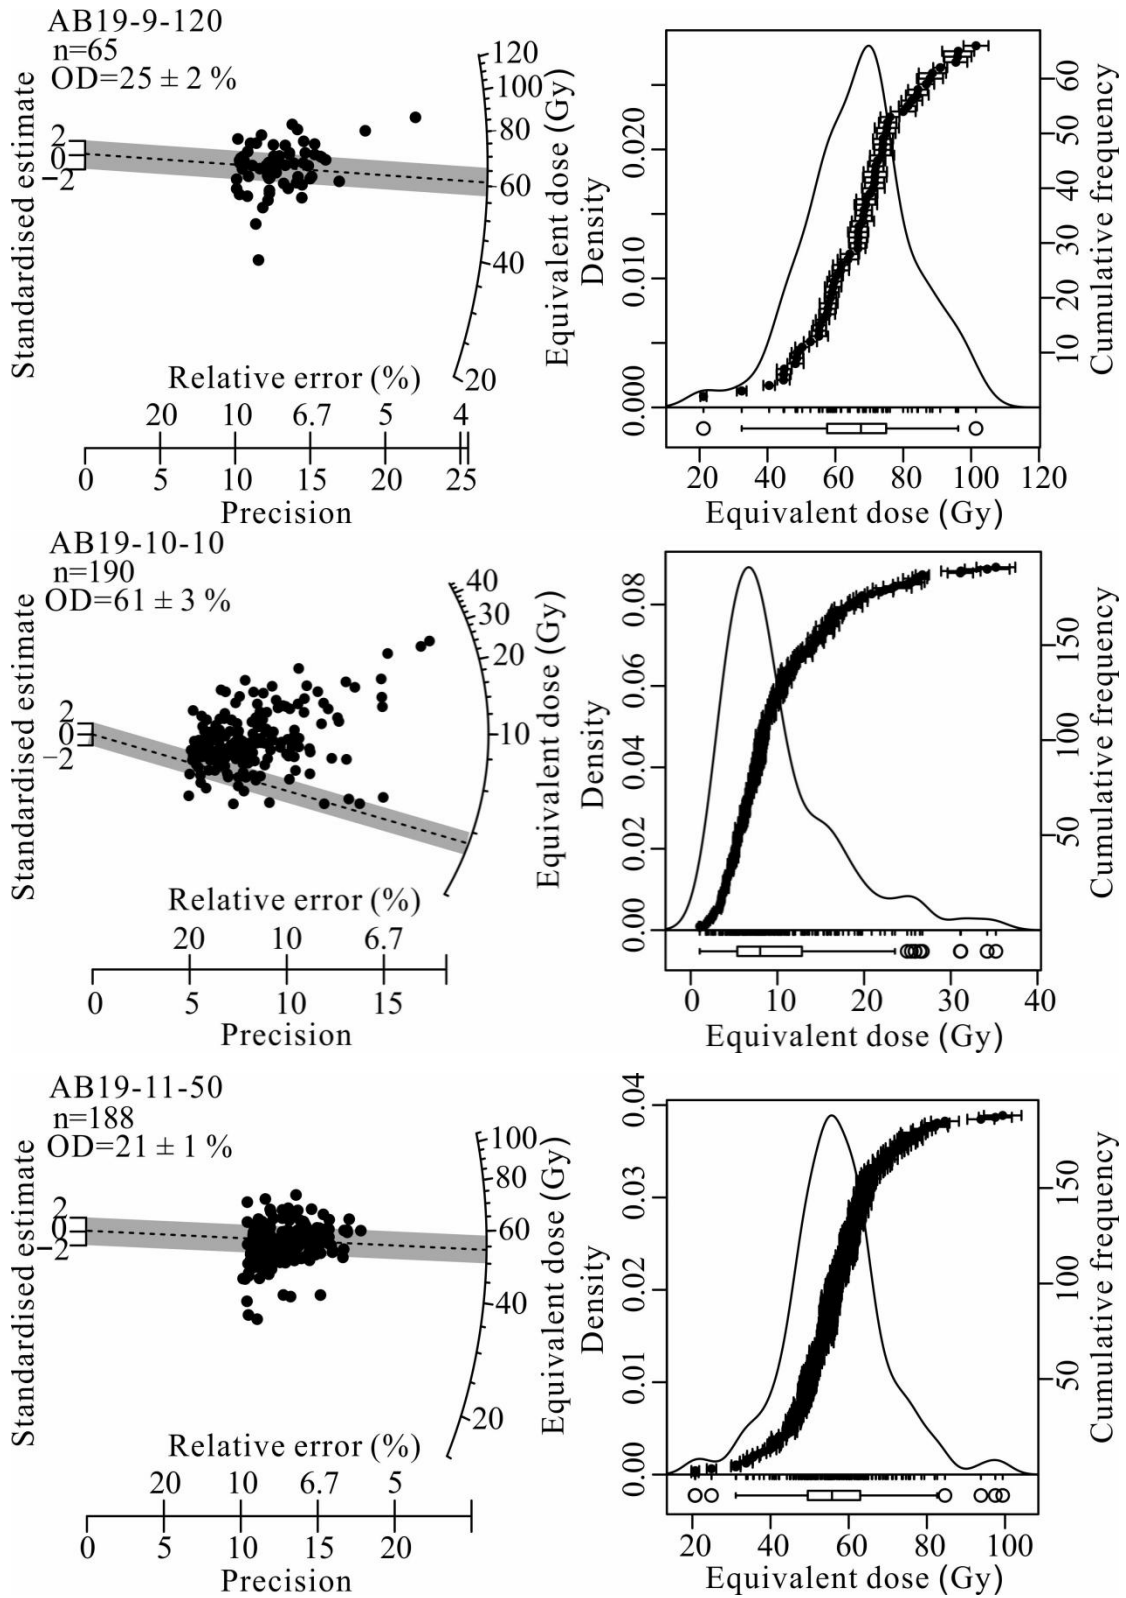

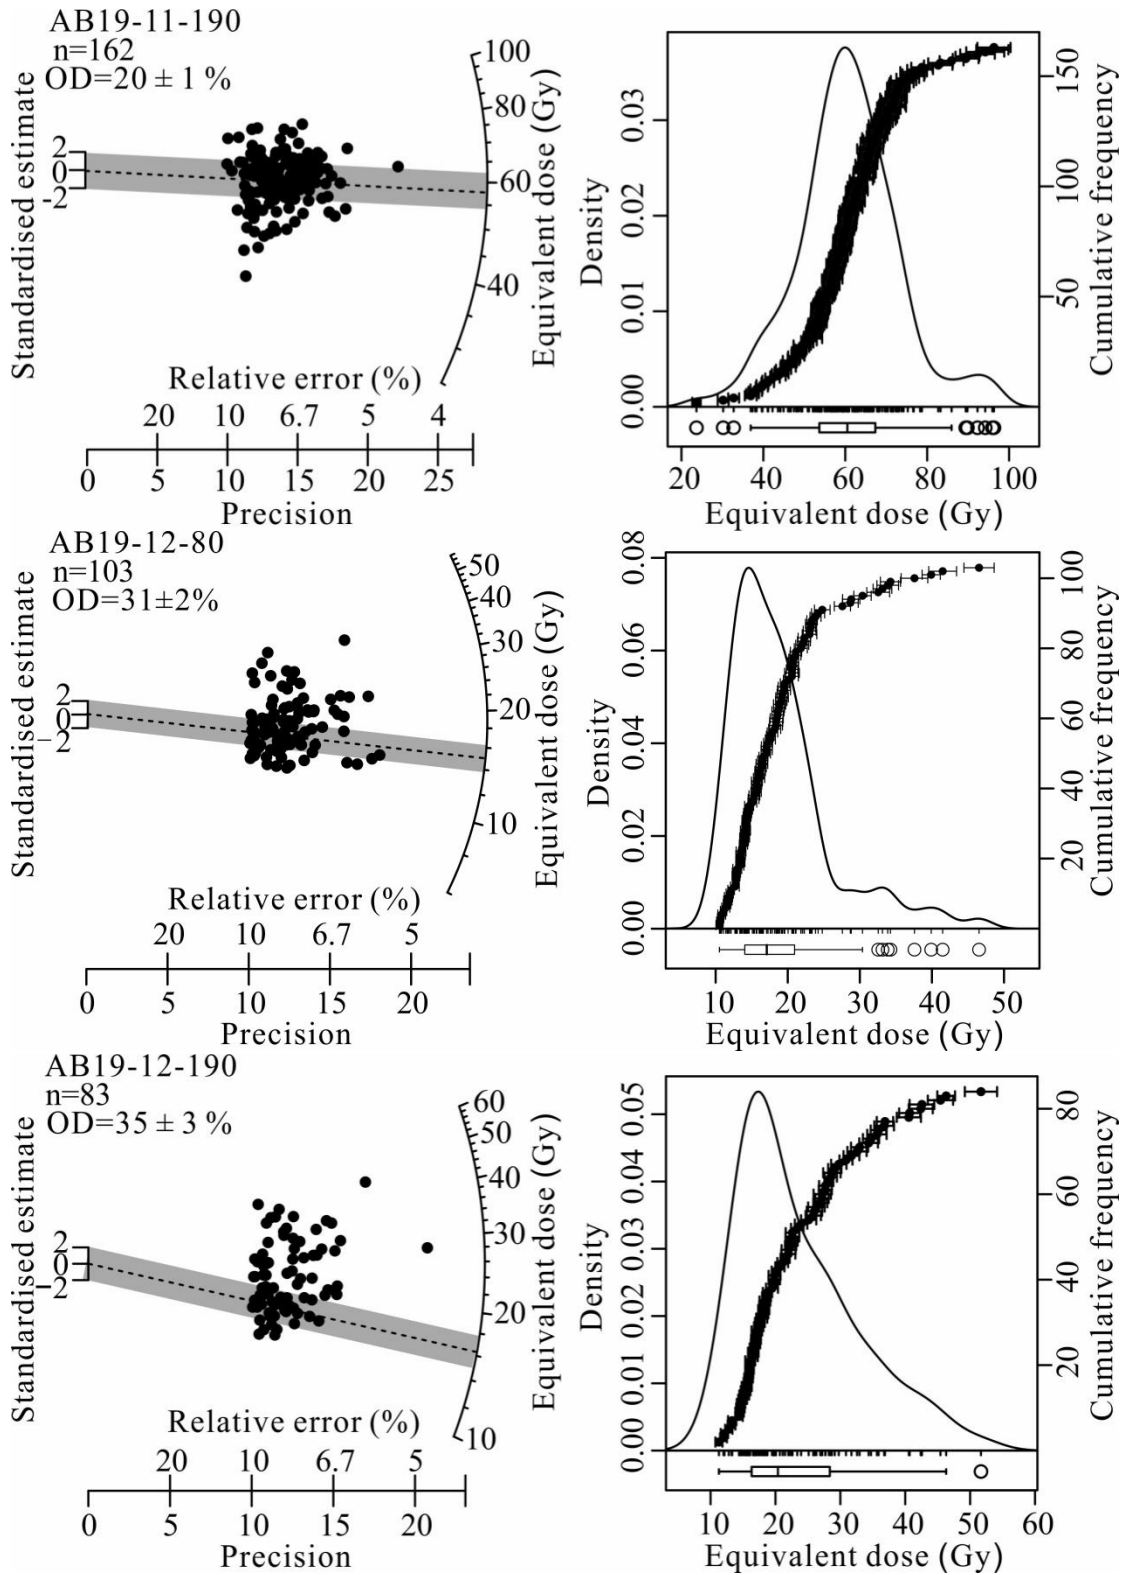

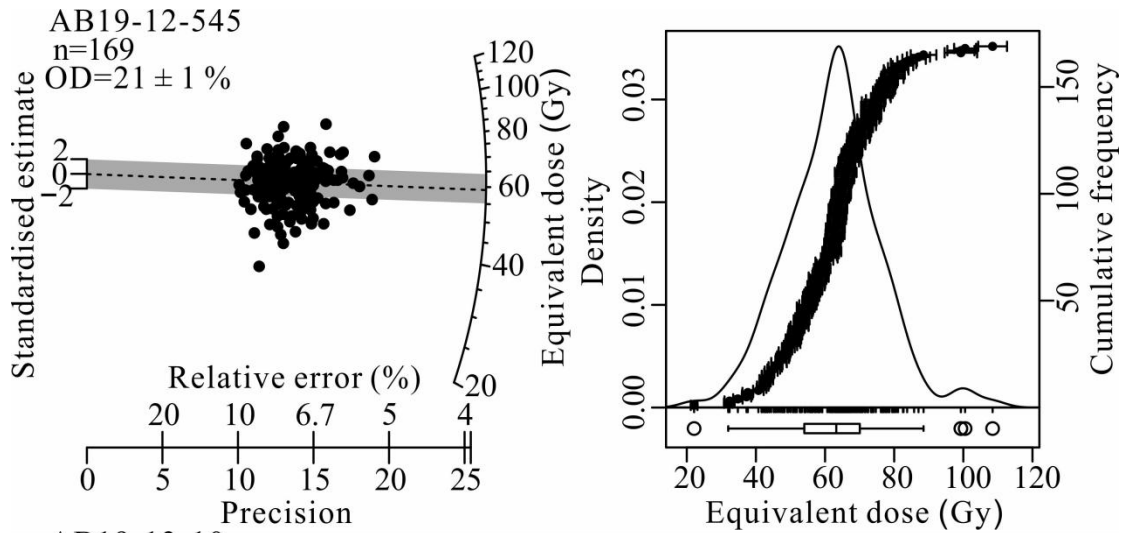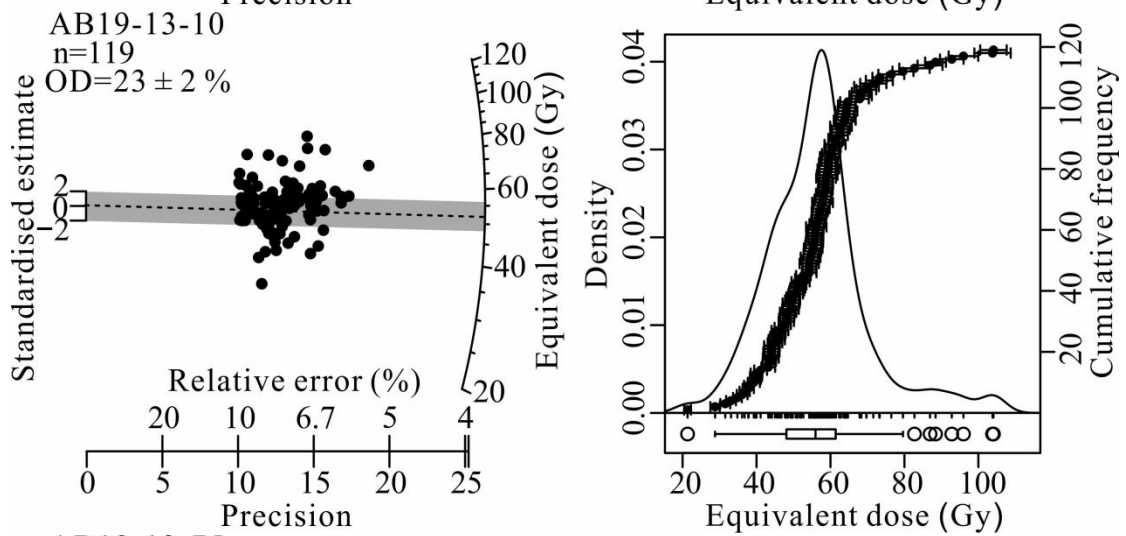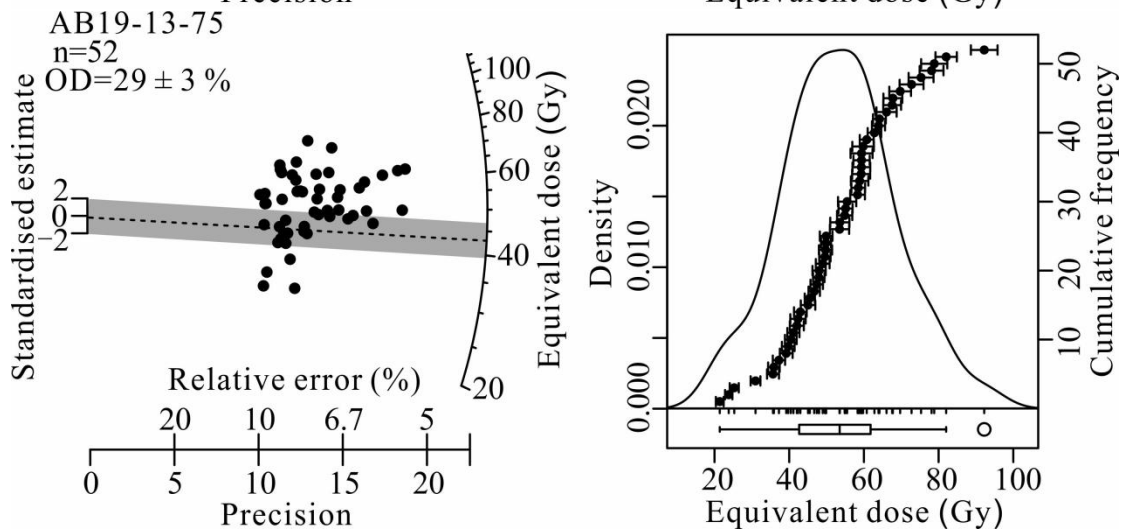

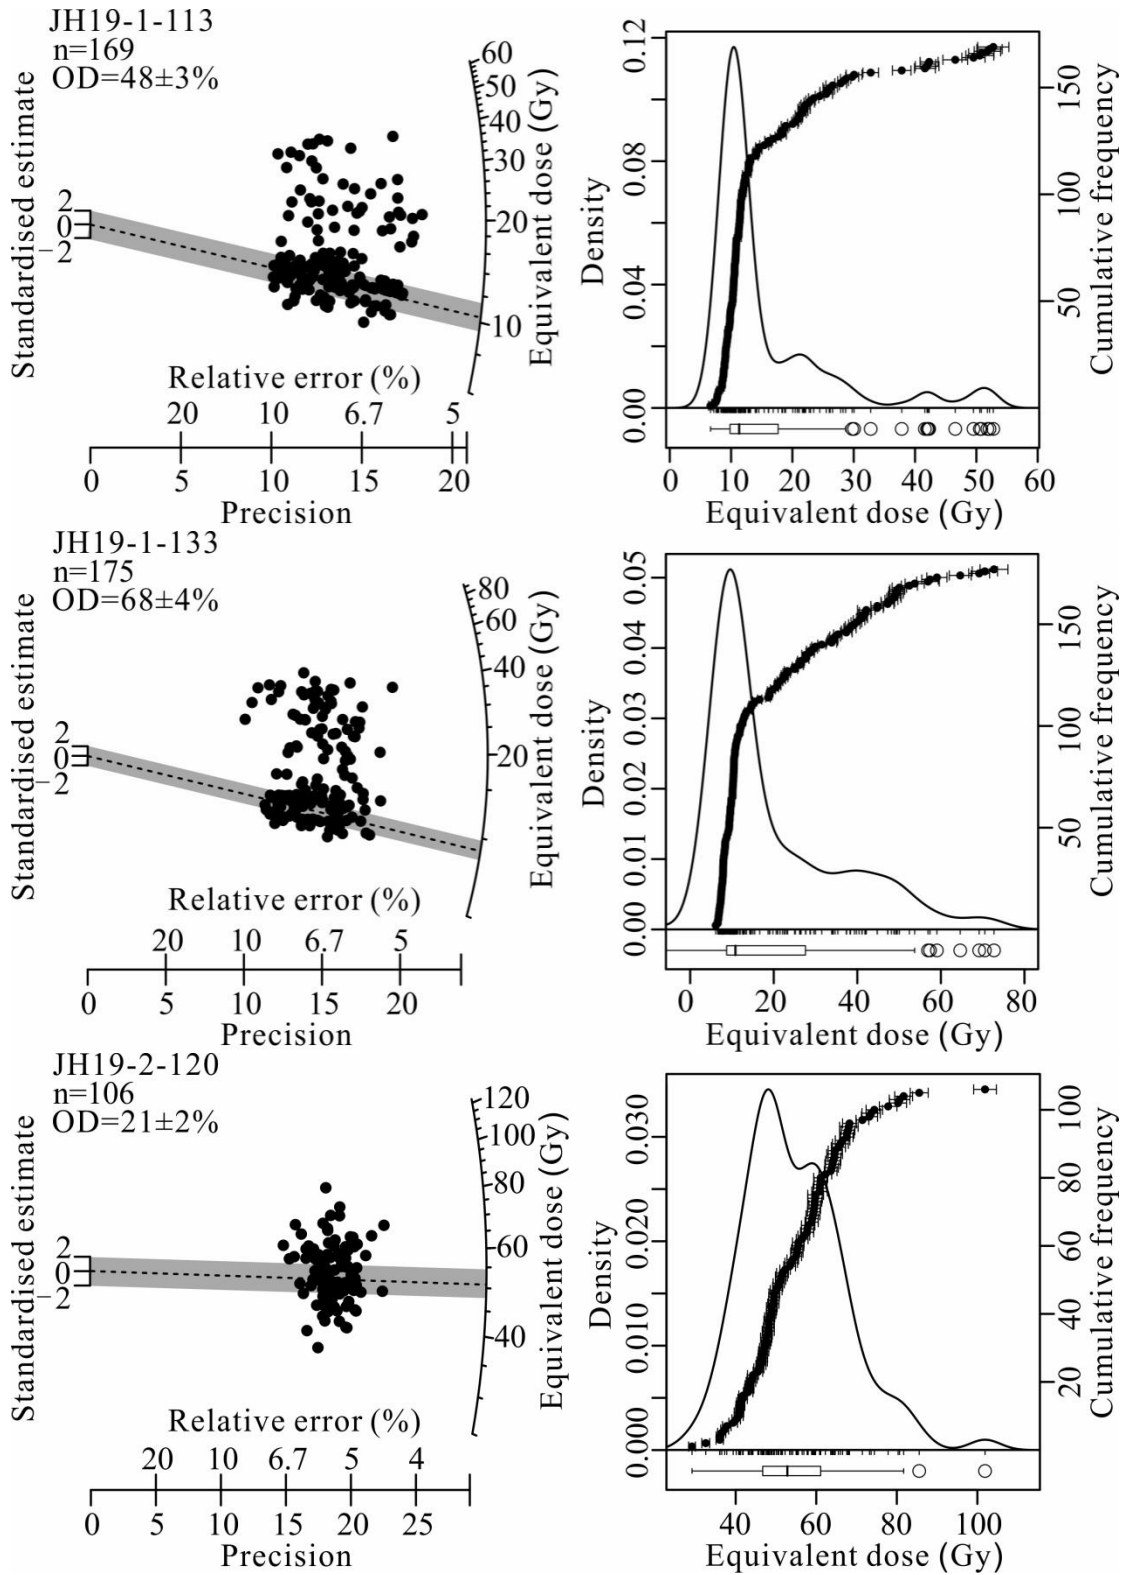



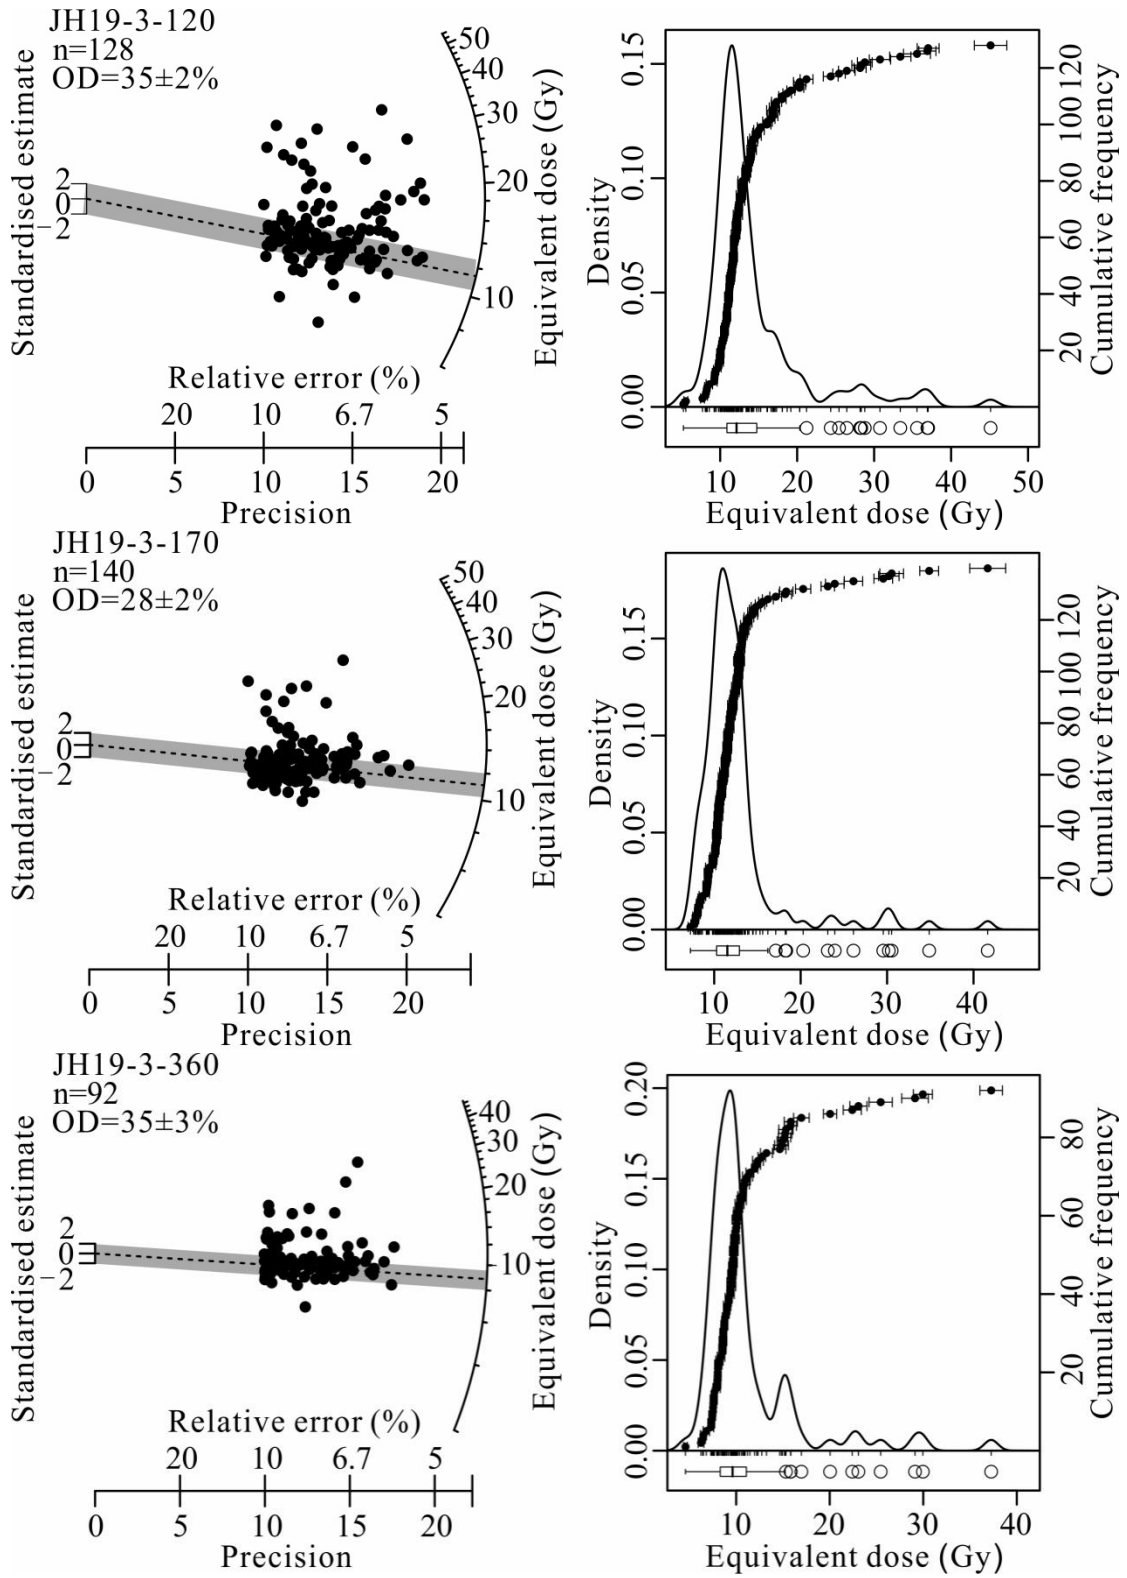

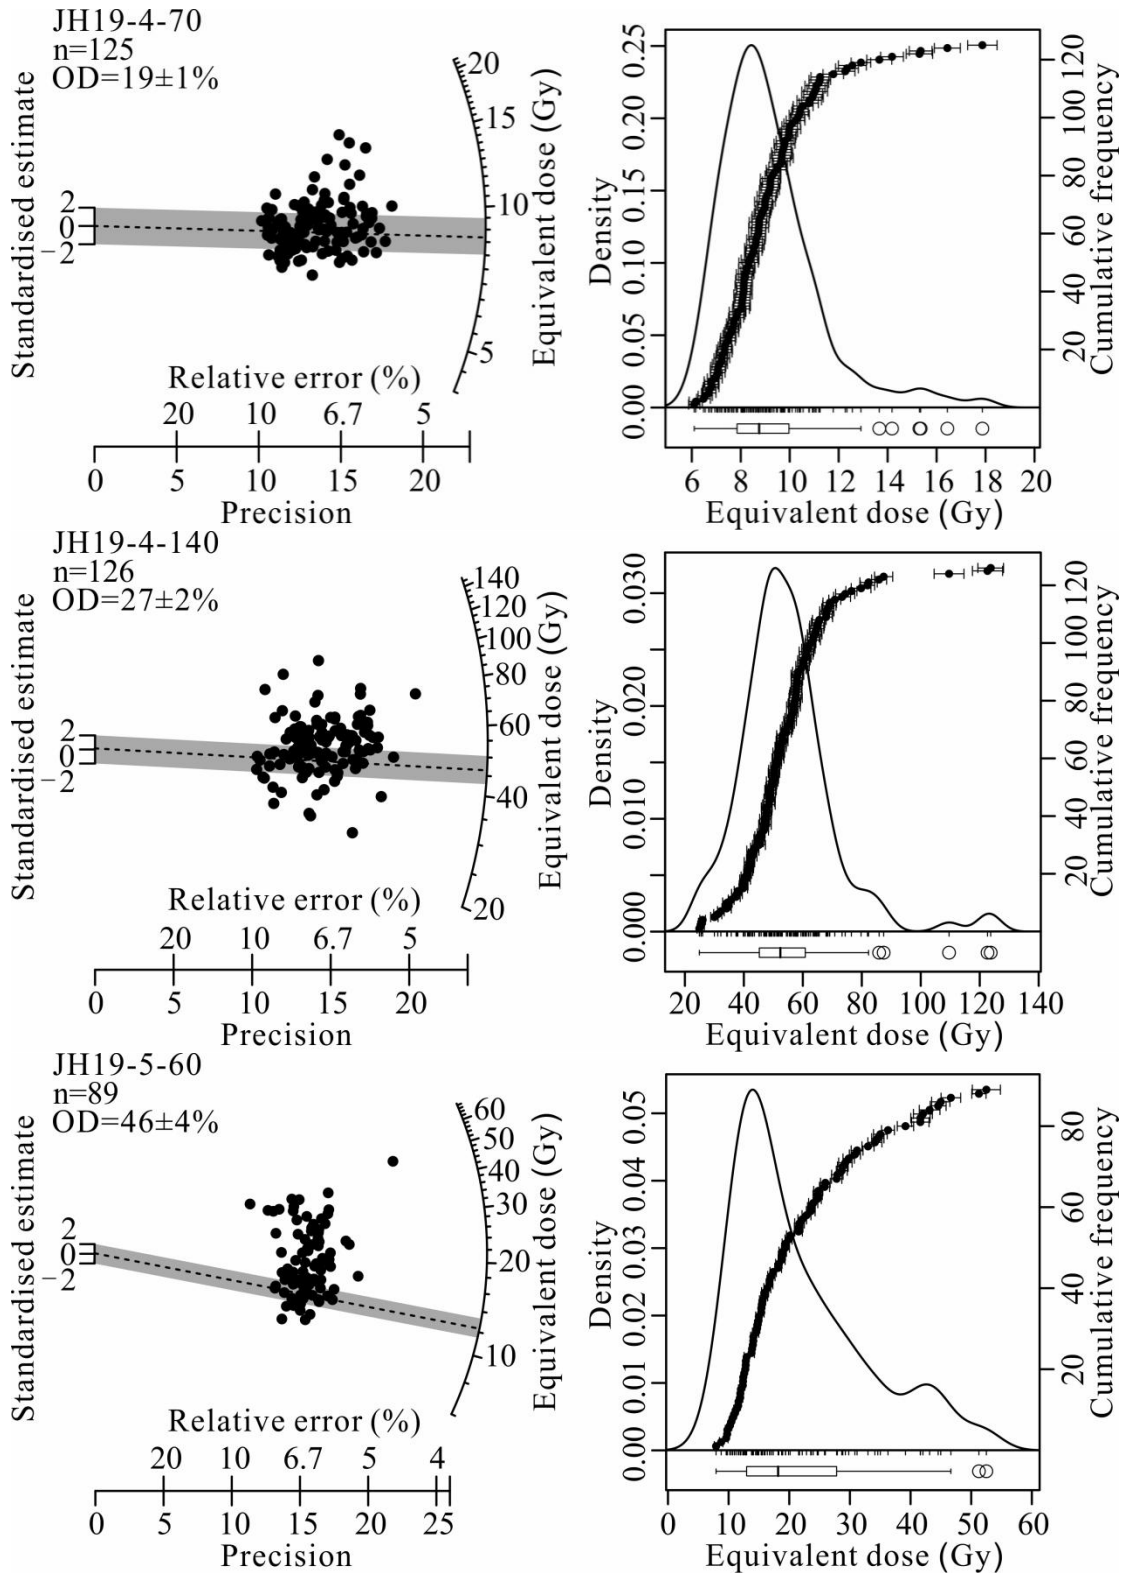

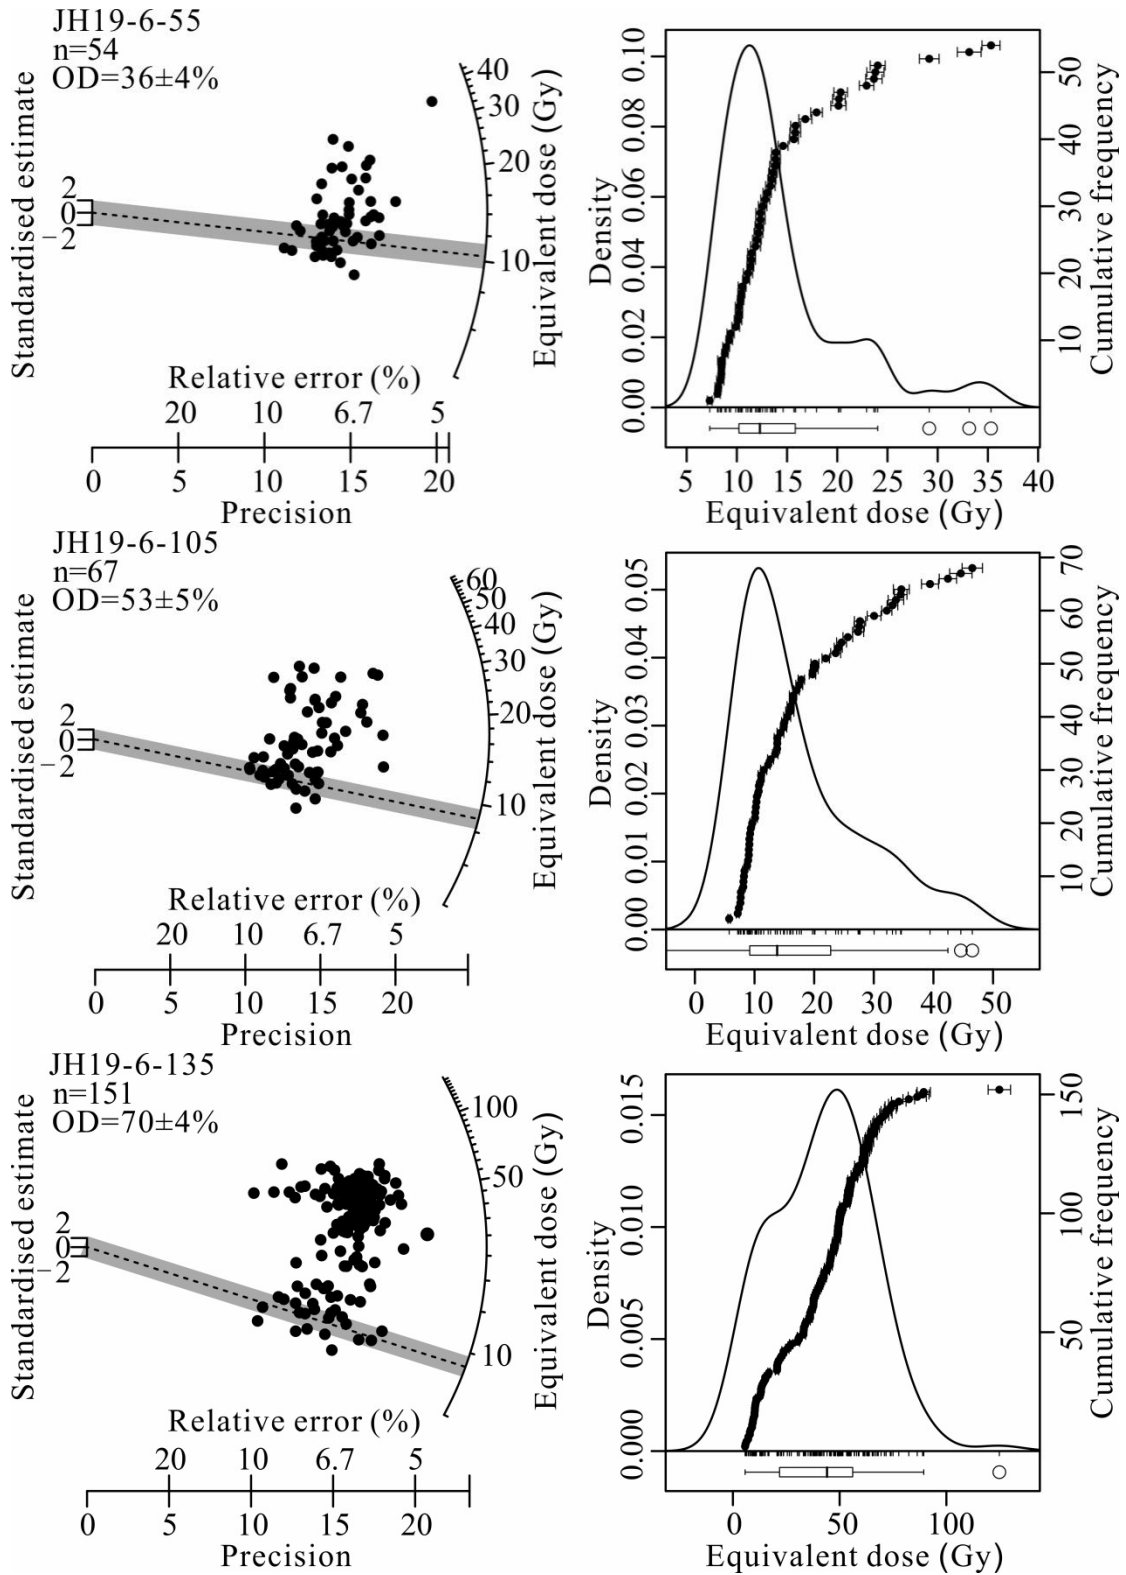

Figure S4. Abanico plots (left) and Kernel Density Estimates (KDEs; right) of all single-grain samples from the shorelines in the Aibi Lake Basin.

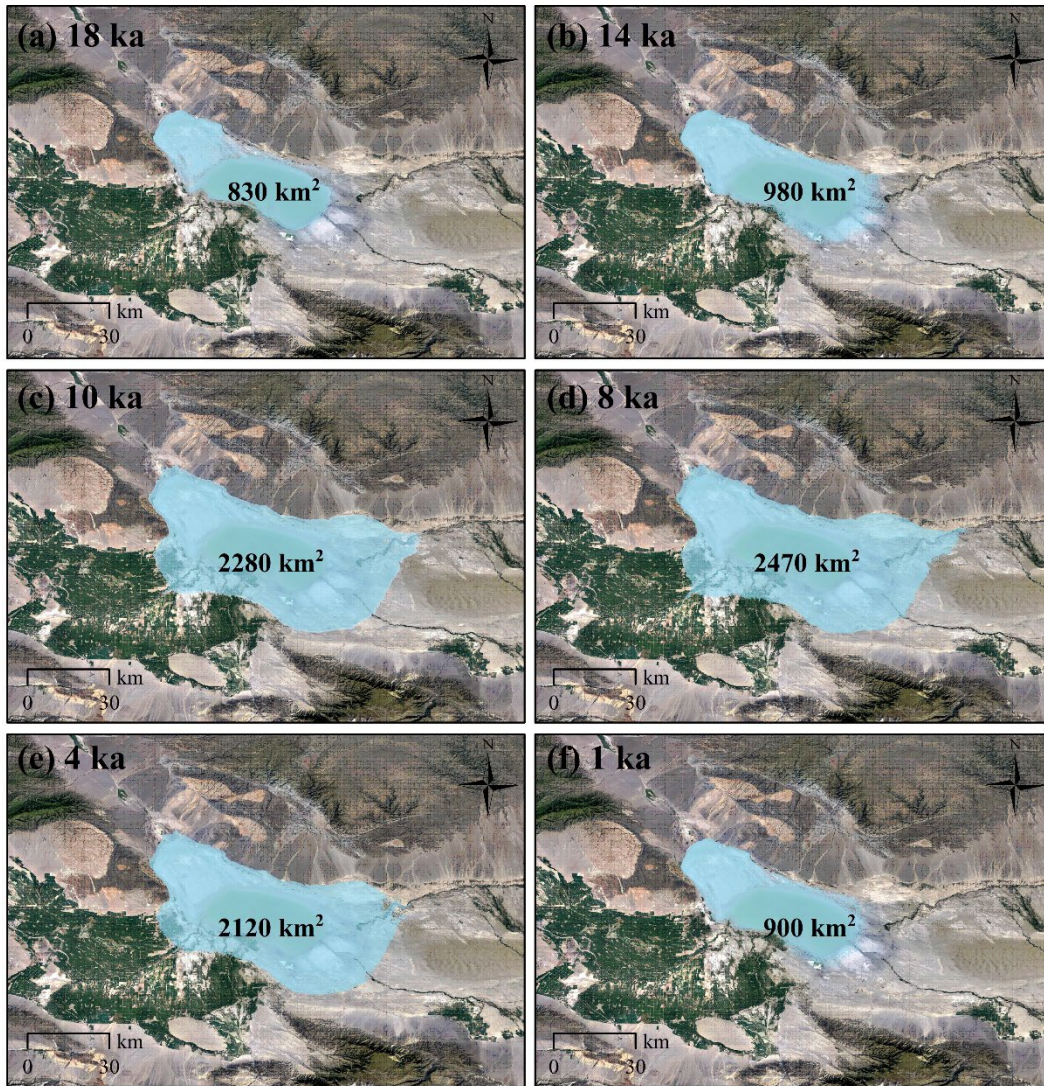

Figure S5. The reconstructed lake covering area changes of Aibi Lake during past 18 ka.

Table S1. Information for samples collected from paleoshorelines in the Aibi Lake

Basin.

| Section | Elevation<br>(m) | Longitude     | Latitude      | Above<br>modern lake<br>level (m) |
|---------|------------------|---------------|---------------|-----------------------------------|
| AB18-1  | 229              | 82°37'33.33"  | 45°09'21.49"  | 35                                |
| AB18-2  | 225              | 82°37'35.18"  | 45°09'17.73"  | 31                                |
| AB18-3  | 223              | 82°38'15.96"  | 45°09'19.83"  | 29                                |
| AB18-4  | 219              | 82°38'25.55"  | 45°09'07.16"  | 25                                |
| AB18-5  | 209              | 82°39'19.35"  | 45°08'42.11"  | 15                                |
| AB18-6  | 203              | 82°39'00.10"  | 45°08'18.06"  | 9                                 |
| AB18-7  | 198              | 82°38'51.34"  | 45°07'56.37"  | 4                                 |
| AB19-7  | 214              | 82°34'39.977" | 45°04'10.601" | 20                                |
| AB19-8  | 208              | 82°34'48.945" | 45°03'56.949" | 14                                |
| AB19-9  | 200              | 82°35'15.328" | 45°04'10.601" | 6                                 |
| AB19-10 | 197              | 82°35'18.135" | 45°04'03.580" | 3                                 |
| AB19-11 | 226              | 82°34'14.704" | 45°04'12.810" | 32                                |
| AB19-12 | 221              | 82°34'17.447" | 45°04'03.550" | 27                                |
| AB19-13 | 230              | 82°34'49.330" | 45°05'06.117" | 36                                |
| JH19-1  | 205              | 83°03'12.023" | 44°41'12.217" | 11                                |
| JH19-2  | 224              | 83°14'01.662" | 44°37'50.373" | 30                                |
| JH19-3  | 221              | 83°13'51.265" | 44°38'00.234" | 27                                |
| JH19-4  | 208              | 83°10'34.753" | 44°39'10.176" | 14                                |
| JH19-5  | 201              | 83°02'44.225" | 44°41'28.306" | 7                                 |
| JH19-6  | 203              | 83°02'44.694" | 44°41'25.487" | 9                                 |

Table S2. Protocol for quartz OSL dating and K-feldspar single-aliquot and single-grain pIRIR dating used for the  $D_e$  measurements of shoreline samples.

| Step | Quartz SAR dating protocol   | Observed       | Single-aliquot pIR <sub>50</sub> IR <sub>170</sub> dating protocol | Observed        | Single-grain pIR <sub>50</sub> IR <sub>170</sub> dating protocol | Observed        |
|------|------------------------------|----------------|--------------------------------------------------------------------|-----------------|------------------------------------------------------------------|-----------------|
| 1    | Give dose $D_i$              |                | Give dose $D_i$                                                    |                 | Give dose $D_i$                                                  |                 |
| 2    | Preheat, 220 °C, 10 s        |                | Preheat at 200 °C for 60 s                                         |                 | Preheat at 200 °C for 60 s                                       |                 |
| 3    | IRSL, 40 s at 50 °C          |                | IRSL, 200 s at 50 °C                                               | L <sub>X1</sub> | IRSL, (laser, 2 s at 50 °C)                                      | L <sub>X1</sub> |
| 4    | OSL, 40 s at 125 °C          | L <sub>x</sub> | pIRIR, 200 s at 170 °C                                             | L <sub>X2</sub> | IRSL, (laser, 2 s at 170°C)                                      | L <sub>X2</sub> |
| 5    | Give test dose               |                | Give test dose                                                     |                 | Give test dose                                                   |                 |
| 6    | Preheat, 180 °C, 10 s        |                | Preheat at 200 °C for 60 s                                         |                 | Preheat at 200 °C for 60 s                                       |                 |
| 7    | IRSL, 40 s at 50 °C          |                | IRSL, 200 s at 50 °C                                               | T <sub>X1</sub> | IRSL, (laser, 2 s at 50 °C)                                      | T <sub>X1</sub> |
| 8    | OSL, 40 s at 125 °C          | T <sub>x</sub> | pIRIR, 200 s at 170 °C                                             | T <sub>X2</sub> | IRSL, (laser, 2 s at 170°C)                                      | T <sub>X2</sub> |
| 9    | Illumination, 40 s at 280 °C |                | IRSL, 100 s bleaching at 205 °C                                    |                 | IRSL, 100 s at 205 °C                                            |                 |
| 10   | Return to 1                  |                | Return to 1                                                        |                 | Return to 1                                                      |                 |

Table S3. Summary of the residual doses for the IR<sub>50</sub> and pIR<sub>50</sub>IR<sub>170</sub> signals after 28h

bleaching under sunlight for the single-aliquot K-feldspar samples from the Aibi Lake

Basin shorelines.

| Sample No.  | IR residual dose (Gy) | pIRIR residual dose (Gy) |
|-------------|-----------------------|--------------------------|
| AB18-1-65   | 0.14±0.01             | 0.35±0.01                |
| AB18-1-180  | 0.16±0.01             | 0.38±0.02                |
| AB18-1-190  | 0.20±0.01             | 0.56±0.04                |
| AB18-2-70   | 0.17±0.01             | 0.36±0.02                |
| AB18-3-45   | 0.11±0.00             | 0.27±0.01                |
| AB18-3-170  | 0.12±0.00             | 0.17±0.01                |
| AB18-3-180  | 0.09±0.00             | 0.27±0.01                |
| AB18-4-60   | 0.18±0.01             | 0.21±0.01                |
| AB18-5-20   | 0.08±0.01             | 0.13±0.01                |
| AB18-5-60   | 0.11±0.01             | 0.19±0.01                |
| AB18-5-120  | 0.06±0.00             | 0.13±0.01                |
| AB18-6-185  | 0.08±0.00             | 0.22±0.01                |
| AB18-6-195  | 0.14±0.01             | 0.27±0.01                |
| AB18-7-30   | 0.11±0.00             | 0.15±0.01                |
| AB18-7-140  | 0.12±0.00             | 0.20±0.01                |
| AB18-7-235  | 0.12±0.00             | 0.18±0.01                |
| AB19-7-100  | 0.07±0.00             | 0.30±0.02                |
| AB19-8-25   | 0.00±0.00             | 0.16±0.06                |
| AB19-9-120  | 0.10±0.01             | 0.52±0.02                |
| AB19-10-10  | 0.03±0.00             | 0.28±0.02                |
| AB19-11-50  | 0.07±0.03             | 0.36±0.02                |
| AB19-11-190 | 0.08±0.01             | 0.53±0.02                |
| AB19-12-80  | 0.05±0.01             | 0.27±0.02                |
| AB19-12-190 | 0.02±0.03             | 0.14±0.03                |
| AB19-12-545 | 0.08±0.01             | 0.45±0.03                |
| AB19-13-10  | 0.09±0.04             | 0.49±0.04                |
| AB19-13-75  | 0.08±0.01             | 0.40±0.03                |
| JH19-1-113  | 0.02±0.02             | 0.11±0.01                |
| JH19-1-133  | 0.00±0.00             | 0.17±0.02                |
| JH19-2-120  | 0.01±0.01             | 0.31±0.03                |
| JH19-2-205  | 0.03±0.00             | 0.22±0.01                |
| JH19-3-120  | 0.00±0.00             | 0.09±0.05                |
| JH19-3-170  | 0.00±0.00             | 0.04±0.01                |
| JH19-3-360  | 0.00±0.00             | 0.03±0.03                |
| JH19-4-70   | 0.00±0.00             | 0.00±0.00                |
| JH19-4-100  | 0.00±0.00             | 0.00±0.00                |
| JH19-4-140  | 0.11±0.02             | 0.25±0.03                |
| JH19-5-60   | 0.04±0.00             | 0.26±0.02                |
| JH19-5-100  | 0.04±0.01             | 0.48±0.02                |
| JH19-5-200  | 0.06±0.01             | 0.42±0.02                |
| JH19-6-55   | 0.04±0.00             | 0.27±0.04                |
| JH19-6-105  | 0.06±0.00             | 0.31±0.01                |
| JH19-6-135  | 0.03±0.00             | 0.31±0.01                |
| JH19-6-170  | 0.05±0.01             | 0.41±0.03                |

Table S4. Summary of the single-aliquot pIRIR ages and the single-grain pIRIR CAM

ages for the K-feldspar samples from paleoshorelines in the Aibi Lake Basin.

| Sample. No  | Altitude (m) | Single-aliquot pIRIR D <sub>e</sub> (Gy) | OD of Single aliquot pIRIR D <sub>e</sub> (%) | Single-grain pIRIR D <sub>e</sub> (Gy) | OD of Single-grain CAM D <sub>e</sub> (%) | Single-aliquot pIRIR age (ka) | Single-grain pIRIR CAM age (ka) |
|-------------|--------------|------------------------------------------|-----------------------------------------------|----------------------------------------|-------------------------------------------|-------------------------------|---------------------------------|
| AB18-1-65   | 227.43       | 63.0±3.0                                 | 11±3                                          | 48.7±1.2                               | 33±2                                      | 15.0±0.9                      | 11.6±0.5                        |
| AB18-1-180  | 228.58       | 71.6±4.6                                 | 22±5                                          | 51.1±2.2                               | 40±3                                      | 16.3±1.2                      | 11.7±0.7                        |
| AB18-1-190  | 228.68       | 81.3±5.7                                 | 24±5                                          | 53.0±2.2                               | 36±3                                      | 20.4±1.6                      | 13.3±0.8                        |
| AB18-2-70   | 224.33       | 73.6±4.3                                 | 14±4                                          | 48.9±1.6                               | 34±2                                      | 19.5±1.4                      | 13.0±0.7                        |
| AB18-3-45   | 222.58       | 21.8±1.0                                 | 11±3                                          | 15.4±0.9                               | 48±4                                      | 5.3±0.3                       | 3.7±0.3                         |
| AB18-3-170  | 221.33       | 26.5±2.1                                 | 27±6                                          | 15.6±0.7                               | 42±3                                      | 6.7±0.6                       | 4.0±0.2                         |
| AB18-3-180  | 221.23       | 24.9±2.4                                 | 31±7                                          | 19.4±1.2                               | 66±4                                      | 5.2±0.5                       | 4.0±0.3                         |
| AB18-4-60   | 218.43       | 16.2±0.7                                 | 9±3                                           | 13.4±0.8                               | 49±4                                      | 4.0±0.2                       | 3.3±0.2                         |
| AB18-5-20   | 208.83       | 14.1±0.8                                 | 14±4                                          | 9.6±0.5                                | 41±4                                      | 3.6±0.2                       | 2.4±0.2                         |
| AB18-5-60   | 208.43       | 15.5±0.3                                 | 4±2                                           | 12.1±0.4                               | 35±2                                      | 3.9±0.2                       | 3.0±0.2                         |
| AB18-5-120  | 207.83       | 16.2±0.9                                 | 19±4                                          | 14.5±0.4                               | 41±2                                      | 4.1±0.3                       | 3.7±0.2                         |
| AB18-6-185  | 201.18       | 118.8±2.3                                | 4±2                                           | 109.6±1.3                              | 16±1                                      | 28.2±1.1                      | 26.0±0.9                        |
| AB18-6-195  | 201.08       | 145.5±9.3                                | 21±5                                          | 100.2±4.1                              | 51±3                                      | 36.2±2.7                      | 24.9±1.4                        |
| AB18-7-30   | 197.73       | 3.6±0.4                                  | 42±8                                          | 2.7±0.3                                | 66±8                                      | 0.9±0.1                       | 0.7±0.1                         |
| AB18-7-140  | 196.63       | 103.4±1.7                                | 3±1                                           | 99.5±1.9                               | 25±1                                      | 28.6±1.5                      | 27.5±1.5                        |
| AB18-7-235  | 195.68       | 89.8±3.4                                 | 9±3                                           | 72.5±1.8                               | 26±2                                      | 24.8±1.6                      | 20.0±1.2                        |
| AB19-7-100  | 213.00       | 24.9±1.1                                 | 15±3                                          | 28.9±1.1                               | 46±3                                      | 4.7±0.3                       | 5.5±0.3                         |
| AB19-8-25   | 207.75       | 11.0±0.4                                 | 11±2                                          | 13.2±0.5                               | 35±3                                      | 2.4±0.1                       | 2.8±0.1                         |
| AB19-9-120  | 198.80       | 60.2±0.8                                 | 2±1                                           | 65.0±2.1                               | 25±2                                      | 13.7±0.6                      | 14.8±0.7                        |
| AB19-10-10  | 196.90       | 4.8±0.4                                  | 28±6                                          | 8.3±0.4                                | 61±3                                      | 1.0±0.1                       | 1.7±0.1                         |
| AB19-11-50  | 225.50       | 50.3±0.9                                 | 6±1                                           | 55.4±0.9                               | 21±1                                      | 13.3±0.6                      | 14.7±0.7                        |
| AB19-11-190 | 224.10       | 51.5±1.2                                 | 6±2                                           | 59.4±1.0                               | 20±1                                      | 10.5±0.5                      | 12.1±0.5                        |
| AB19-12-80  | 220.20       | 16.3±0.5                                 | 8±2                                           | 16.3±0.5                               | 31±2                                      | 3.5±0.2                       | 3.5±0.2                         |
| AB19-12-190 | 219.10       | 19.5±0.4                                 | 7±1                                           | 22.0±0.9                               | 35±3                                      | 4.1±0.2                       | 4.6±0.3                         |
| AB19-12-545 | 215.55       | 56.1±0.8                                 | 4±1                                           | 60.8±1.1                               | 21±1                                      | 11.6±0.5                      | 12.5±0.5                        |
| AB19-13-10  | 229.90       | 54.0±1.4                                 | 6±2                                           | 54.7±1.2                               | 23±2                                      | 10.2±0.5                      | 10.3±0.5                        |
| AB19-13-75  | 229.25       | 49.5±1.7                                 | 12±2                                          | 51.2±2.1                               | 29±3                                      | 9.5±0.5                       | 9.8±0.5                         |
| JH19-1-113  | 203.87       | 19.7±1.6                                 | 30±6                                          | 13.5±0.5                               | 48±3                                      | 4.2±0.4                       | 2.9±0.2                         |
| JH19-1-133  | 203.67       | 19.0±1.4                                 | 26±5                                          | 15.3±0.8                               | 68±4                                      | 4.2±0.3                       | 3.4±0.2                         |
| JH19-2-120  | 222.80       | 53.5±1.0                                 | 4±1                                           | 53.4±1.1                               | 21±2                                      | 12.4±0.5                      | 12.3±0.5                        |
| JH19-2-205  | 221.95       | 46.1±0.8                                 | 4±1                                           | 48.2±0.7                               | 17±1                                      | 10.9±0.5                      | 11.4±0.5                        |
| JH19-3-120  | 219.80       | 13.2±1.0                                 | 26±5                                          | 13.3±0.4                               | 35±2                                      | 2.9±0.2                       | 3.0±0.1                         |
| JH19-3-170  | 219.30       | 12.7±0.4                                 | 12±2                                          | 11.9±0.3                               | 28±2                                      | 2.9±0.1                       | 2.7±0.1                         |
| JH19-3-360  | 217.40       | 10.9±0.6                                 | 18±4                                          | 10.3±0.4                               | 35±3                                      | 2.7±0.2                       | 2.6±0.1                         |
| JH19-4-70   | 207.30       | 9.7±0.3                                  | 11±2                                          | 9.0±0.2                                | 19±1                                      | 2.4±0.1                       | 2.2±0.1                         |
| JH19-4-100  | 207.00       | 9.4±0.3                                  | 11±2                                          | 9.8±0.2                                | 15±1                                      | 2.3±0.1                       | 2.4±0.1                         |
| JH19-4-140  | 206.60       | 46.1±2.1                                 | 16±3                                          | 52.3±1.3                               | 27±2                                      | 11.9±0.7                      | 13.5±0.6                        |
| JH19-5-60   | 200.40       | 24.2±1.0                                 | 14±3                                          | 19.2±1.0                               | 46±4                                      | 5.3±0.3                       | 4.2±0.3                         |
| JH19-5-100  | 200.00       | 59.5±0.7                                 | 2±1                                           | 61.1±1.2                               | 24±1                                      | 13.6±0.5                      | 13.9±0.6                        |



|            |        |          |      |          |      |          |          |
|------------|--------|----------|------|----------|------|----------|----------|
| JH19-5-200 | 199.00 | 53.5±0.8 | 3±1  | 59.0±1.1 | 23±1 | 12.7±0.5 | 14.0±0.6 |
| JH19-6-55  | 202.45 | 18.0±0.7 | 13±3 | 13.1±0.7 | 36±4 | 4.0±0.2  | 2.9±0.2  |
| JH19-6-105 | 201.95 | 17.6±0.7 | 12±3 | 14.9±1.0 | 53±5 | 4.0±0.2  | 3.4±0.3  |
| JH19-6-135 | 201.65 | 41.7±1.2 | 8±2  | 34.2±2.0 | 70±4 | 9.7±0.4  | 8.0±0.5  |
| JH19-6-170 | 201.30 | 55.8±1.6 | 9±2  | 60.9±0.9 | 19±1 | 14.0±0.6 | 15.3±0.6 |

---

Table S5. Summary of accepted grains passing the rejection criteria for K-feldspar samples from the Aibi Lake Basin.

| Sample No.  | Measured grains | Brightest 30% grains* | Rejection criteria (see footnotes) |    |     |     |   |   |    |   | Rejected grains | Accepted grains |
|-------------|-----------------|-----------------------|------------------------------------|----|-----|-----|---|---|----|---|-----------------|-----------------|
|             |                 |                       | 1                                  | 2  | 3   | 4   | 5 | 6 | 7  | 8 |                 |                 |
| AB18-1-65   | 800             | 240                   | 1                                  | 0  | 3   | 52  | 0 | 0 | 4  | 0 | 60              | 180             |
| AB18-1-180  | 700             | 210                   | 2                                  | 0  | 9   | 107 | 0 | 0 | 2  | 0 | 120             | 90              |
| AB18-1-190  | 700             | 210                   | 1                                  | 0  | 19  | 96  | 0 | 0 | 15 | 0 | 131             | 79              |
| AB18-2-70   | 700             | 210                   | 2                                  | 0  | 5   | 88  | 0 | 0 | 4  | 0 | 99              | 111             |
| AB18-3-45   | 700             | 210                   | 3                                  | 0  | 116 | 12  | 0 | 1 | 3  | 0 | 135             | 75              |
| AB18-3-170  | 700             | 210                   | 6                                  | 1  | 86  | 12  | 0 | 0 | 5  | 0 | 110             | 100             |
| AB18-3-180  | 900             | 270                   | 5                                  | 0  | 71  | 65  | 0 | 0 | 4  | 0 | 145             | 125             |
| AB18-4-60   | 700             | 210                   | 13                                 | 4  | 107 | 12  | 0 | 0 | 5  | 0 | 141             | 69              |
| AB18-5-20   | 700             | 210                   | 11                                 | 2  | 107 | 18  | 0 | 0 | 7  | 0 | 145             | 65              |
| AB18-5-60   | 700             | 210                   | 1                                  | 0  | 50  | 8   | 0 | 0 | 8  | 0 | 67              | 143             |
| AB18-5-120  | 700             | 210                   | 0                                  | 0  | 21  | 4   | 0 | 0 | 3  | 0 | 28              | 182             |
| AB18-6-185  | 700             | 210                   | 1                                  | 0  | 6   | 2   | 0 | 0 | 0  | 0 | 9               | 201             |
| AB18-6-195  | 700             | 210                   | 4                                  | 0  | 41  | 5   | 0 | 0 | 7  | 0 | 57              | 153             |
| AB18-7-30   | 800             | 240                   | 13                                 | 5  | 167 | 1   | 0 | 8 | 7  | 0 | 201             | 39              |
| AB18-7-140  | 800             | 240                   | 7                                  | 0  | 29  | 7   | 0 | 0 | 1  | 0 | 44              | 196             |
| AB18-7-235  | 500             | 150                   | 0                                  | 0  | 25  | 6   | 0 | 1 | 8  | 0 | 40              | 110             |
| AB19-7-100  | 800             | 240                   | 2                                  | 0  | 78  | 5   | 0 | 0 | 4  | 0 | 89              | 151             |
| AB19-8-25   | 1400            | 420                   | 12                                 | 0  | 292 | 13  | 0 | 0 | 3  | 0 | 320             | 100             |
| AB19-9-120  | 1300            | 390                   | 141                                | 96 | 86  | 1   | 0 | 0 | 1  | 0 | 325             | 65              |
| AB19-10-10  | 1100            | 330                   | 4                                  | 0  | 124 | 0   | 0 | 8 | 4  | 0 | 140             | 190             |
| AB19-11-50  | 700             | 210                   | 2                                  | 0  | 10  | 10  | 0 | 0 | 0  | 0 | 22              | 188             |
| AB19-11-190 | 600             | 180                   | 6                                  | 0  | 7   | 5   | 0 | 0 | 0  | 0 | 18              | 162             |
| AB19-12-80  | 1100            | 330                   | 13                                 | 1  | 210 | 2   | 0 | 0 | 1  | 0 | 227             | 103             |
| AB19-12-190 | 700             | 210                   | 2                                  | 0  | 116 | 4   | 0 | 0 | 5  | 0 | 127             | 83              |
| AB19-12-545 | 600             | 180                   | 1                                  | 0  | 6   | 4   | 0 | 0 | 0  | 0 | 11              | 169             |
| AB19-13-10  | 1300            | 390                   | 64                                 | 49 | 146 | 10  | 0 | 1 | 1  | 0 | 271             | 119             |
| AB19-13-75  | 200             | 60                    | 0                                  | 0  | 7   | 1   | 0 | 0 | 0  | 0 | 8               | 52              |

|            |      |     |    |   |    |     |    |   |   |   |     |     |
|------------|------|-----|----|---|----|-----|----|---|---|---|-----|-----|
| JH19-1-113 | 800  | 240 | 7  | 0 | 19 | 43  | 0  | 0 | 2 | 0 | 71  | 169 |
| JH19-1-133 | 700  | 210 | 5  | 0 | 3  | 25  | 0  | 0 | 2 | 0 | 35  | 175 |
| JH19-2-120 | 500  | 150 | 23 | 0 | 4  | 13  | 0  | 0 | 4 | 0 | 44  | 106 |
| JH19-2-205 | 600  | 180 | 1  | 0 | 5  | 9   | 0  | 0 | 0 | 0 | 15  | 165 |
| JH19-3-120 | 600  | 180 | 3  | 0 | 18 | 31  | 0  | 0 | 0 | 0 | 52  | 128 |
| JH19-3-170 | 800  | 240 | 6  | 0 | 9  | 81  | 1  | 1 | 2 | 0 | 100 | 140 |
| JH19-3-360 | 1000 | 300 | 17 | 0 | 2  | 110 | 77 | 0 | 2 | 0 | 208 | 92  |
| JH19-4-70  | 800  | 240 | 3  | 0 | 11 | 99  | 0  | 0 | 2 | 0 | 115 | 125 |
| JH19-4-100 | 600  | 180 | 2  | 0 | 5  | 52  | 0  | 0 | 0 | 0 | 59  | 121 |
| JH19-4-140 | 500  | 150 | 6  | 0 | 9  | 9   | 0  | 0 | 0 | 0 | 24  | 126 |
| JH19-5-60  | 400  | 120 | 1  | 0 | 1  | 29  | 0  | 0 | 0 | 0 | 31  | 89  |
| JH19-5-100 | 600  | 180 | 3  | 0 | 2  | 10  | 0  | 0 | 0 | 0 | 15  | 165 |
| JH19-5-200 | 600  | 180 | 1  | 0 | 0  | 16  | 0  | 0 | 0 | 0 | 17  | 163 |
| JH19-6-55  | 400  | 120 | 1  | 0 | 5  | 60  | 0  | 0 | 0 | 0 | 66  | 54  |
| JH19-6-105 | 400  | 120 | 2  | 0 | 4  | 46  | 0  | 0 | 1 | 0 | 53  | 67  |
| JH19-6-135 | 600  | 180 | 7  | 0 | 3  | 18  | 0  | 0 | 1 | 0 | 29  | 151 |
| JH19-6-170 | 800  | 240 | 3  | 0 | 10 | 33  | 0  | 0 | 3 | 0 | 49  | 191 |

Notes: Rejection criteria are as follows: Criteria 1 are recycling ratio limits (15%); criteria 2 is a max test dose error (> 10%); criteria 3 is maximum palaeodose error (> 10%); criteria 4 is maximum recuperation of the largest regeneration dose signal (> 5%); criteria 5 is that the  $T_n$  signal >  $3\sigma$  above background; criteria 6 are any negative  $D_e$  values; criteria 7 are any  $D_e$  values obtained by extrapolation of the dose-response curve beyond the largest regenerative dose; criteria 8 is if the dose response curve fit is not good.

Table S6. Summary of single-grain pIRIR dating results for samples from the Aibi Lake Basin.

| Sample No. | Altitude (m) | Grain size ( $\mu\text{m}$ ) | Effective grains/All grains | Single grain pIRIR $D_e$ (Gy) | U (ppm)        | Th (ppm)        | K (%)           | Rb (ppm)      | W.C. (%)     | Cosmic dose rate (Gy/ka) | Dose rate (Gy/ka) | Single-grain pIRIR MAM age (ka) |
|------------|--------------|------------------------------|-----------------------------|-------------------------------|----------------|-----------------|-----------------|---------------|--------------|--------------------------|-------------------|---------------------------------|
| AB18-1-65  | 227.43       | 180-250                      | 180/800                     | 39.0 $\pm$ 2.5                | 1.77 $\pm$ 0.3 | 5.89 $\pm$ 0.6  | 2.37 $\pm$ 0.04 | 65.7 $\pm$ 3  | 5 $\pm$ 2.5  | 0.18 $\pm$ 0.02          | 4.21 $\pm$ 0.16   | 9.3 $\pm$ 0.7                   |
| AB18-1-180 | 228.58       | 180-250                      | 90/700                      | 33.7 $\pm$ 2.6                | 2.20 $\pm$ 0.4 | 6.71 $\pm$ 0.6  | 2.34 $\pm$ 0.04 | 82.7 $\pm$ 3  | 5 $\pm$ 2.5  | 0.23 $\pm$ 0.02          | 4.38 $\pm$ 0.18   | 7.7 $\pm$ 0.7                   |
| AB18-1-190 | 228.68       | 180-250                      | 79/700                      | 39.3 $\pm$ 2.9                | 1.50 $\pm$ 0.3 | 5.00 $\pm$ 0.5  | 2.20 $\pm$ 0.04 | 68.4 $\pm$ 3  | 5 $\pm$ 2.5  | 0.24 $\pm$ 0.02          | 3.99 $\pm$ 0.16   | 9.9 $\pm$ 0.8                   |
| AB18-2-70  | 224.33       | 180-250                      | 111/700                     | 39.0 $\pm$ 3.1                | 1.96 $\pm$ 0.3 | 4.85 $\pm$ 0.5  | 2.05 $\pm$ 0.04 | 68.4 $\pm$ 3  | 10 $\pm$ 2.5 | 0.21 $\pm$ 0.02          | 3.77 $\pm$ 0.15   | 10.3 $\pm$ 0.9                  |
| AB18-3-45  | 222.58       | 180-250                      | 75/700                      | 9.3 $\pm$ 0.7                 | 2.16 $\pm$ 0.4 | 6.64 $\pm$ 0.6  | 2.28 $\pm$ 0.04 | 84.6 $\pm$ 3  | 10 $\pm$ 2.5 | 0.23 $\pm$ 0.02          | 4.14 $\pm$ 0.17   | 2.3 $\pm$ 0.2                   |
| AB18-3-170 | 221.33       | 180-250                      | 100/700                     | 10.1 $\pm$ 0.8                | 1.86 $\pm$ 0.3 | 5.85 $\pm$ 0.5  | 2.22 $\pm$ 0.04 | 70.6 $\pm$ 3  | 10 $\pm$ 2.5 | 0.18 $\pm$ 0.02          | 3.93 $\pm$ 0.16   | 2.6 $\pm$ 0.2                   |
| AB18-3-180 | 221.23       | 180-250                      | 125/900                     | 8.7 $\pm$ 0.6                 | 6.53 $\pm$ 0.5 | 8.38 $\pm$ 0.6  | 1.92 $\pm$ 0.04 | 75.0 $\pm$ 3  | 10 $\pm$ 2.5 | 0.17 $\pm$ 0.02          | 4.80 $\pm$ 0.19   | 1.8 $\pm$ 0.2                   |
| AB18-4-60  | 218.43       | 180-250                      | 69/700                      | 9.9 $\pm$ 0.5                 | 2.09 $\pm$ 0.4 | 5.78 $\pm$ 0.5  | 2.08 $\pm$ 0.04 | 64.8 $\pm$ 3  | 5 $\pm$ 2.5  | 0.21 $\pm$ 0.02          | 4.04 $\pm$ 0.17   | 2.5 $\pm$ 0.2                   |
| AB18-5-20  | 208.83       | 180-250                      | 65/700                      | 7.9 $\pm$ 0.4                 | 1.54 $\pm$ 0.3 | 4.71 $\pm$ 0.5  | 2.21 $\pm$ 0.04 | 72.9 $\pm$ 3  | 5 $\pm$ 2.5  | 0.25 $\pm$ 0.03          | 3.95 $\pm$ 0.16   | 2.0 $\pm$ 0.1                   |
| AB18-5-60  | 208.43       | 180-250                      | 143/700                     | 9.2 $\pm$ 0.6                 | 1.61 $\pm$ 0.3 | 5.45 $\pm$ 0.6  | 2.2 $\pm$ 0.04  | 76.2 $\pm$ 3  | 5 $\pm$ 2.5  | 0.21 $\pm$ 0.02          | 4.02 $\pm$ 0.16   | 2.3 $\pm$ 0.2                   |
| AB18-5-120 | 207.83       | 180-250                      | 182/700                     | 10.2 $\pm$ 0.6                | 1.50 $\pm$ 0.3 | 5.00 $\pm$ 0.5  | 2.2 $\pm$ 0.04  | 56.0 $\pm$ 3  | 5 $\pm$ 2.5  | 0.17 $\pm$ 0.02          | 3.92 $\pm$ 0.16   | 2.6 $\pm$ 0.2                   |
| AB18-6-185 | 201.18       | 125-150                      | 201/700                     | 108.9 $\pm$ 2.1               | 2.84 $\pm$ 0.4 | 14.73 $\pm$ 0.7 | 2.19 $\pm$ 0.04 | 99.1 $\pm$ 3  | 15 $\pm$ 2.5 | 0.18 $\pm$ 0.02          | 4.21 $\pm$ 0.14   | 25.8 $\pm$ 1                    |
| AB18-6-195 | 201.08       | 180-250                      | 153/700                     | 49.7 $\pm$ 4.2                | 1.94 $\pm$ 0.3 | 7.00 $\pm$ 0.6  | 2.07 $\pm$ 0.04 | 79.2 $\pm$ 3  | 15 $\pm$ 5   | 0.17 $\pm$ 0.02          | 4.02 $\pm$ 0.16   | 12.4 $\pm$ 1.2                  |
| AB18-7-30  | 197.73       | 180-250                      | 39/800                      | 1.6 $\pm$ 0.2                 | 1.54 $\pm$ 0.3 | 4.92 $\pm$ 0.5  | 2.15 $\pm$ 0.04 | 66.9 $\pm$ 3  | 5 $\pm$ 2.5  | 0.23 $\pm$ 0.02          | 3.93 $\pm$ 0.16   | 0.42 $\pm$ 0.04                 |
| AB18-7-140 | 196.63       | 180-250                      | 196/800                     | 90.8 $\pm$ 6.1                | 1.98 $\pm$ 0.3 | 6.56 $\pm$ 0.6  | 1.92 $\pm$ 0.04 | 69.4 $\pm$ 3  | 15 $\pm$ 5   | 0.19 $\pm$ 0.02          | 3.62 $\pm$ 0.18   | 25.1 $\pm$ 2.2                  |
| AB18-7-235 | 195.68       | 180-250                      | 110/500                     | 66.1 $\pm$ 4.2                | 2.15 $\pm$ 0.4 | 7.31 $\pm$ 0.6  | 1.98 $\pm$ 0.04 | 79.2 $\pm$ 3  | 15 $\pm$ 2.5 | 0.17 $\pm$ 0.02          | 3.62 $\pm$ 0.19   | 18.3 $\pm$ 1.5                  |
| AB19-7-100 | 213.00       | 180-250                      | 151/800                     | 15.9 $\pm$ 1.2                | 2.57 $\pm$ 0.4 | 11.24 $\pm$ 0.7 | 2.94 $\pm$ 0.04 | 135.5 $\pm$ 4 | 5 $\pm$ 2.5  | 0.19 $\pm$ 0.02          | 5.28 $\pm$ 0.20   | 3.0 $\pm$ 0.3                   |
| AB19-8-25  | 207.75       | 180-250                      | 100/1400                    | 11.2 $\pm$ 0.4                | 1.63 $\pm$ 0.3 | 7.04 $\pm$ 0.6  | 2.76 $\pm$ 0.04 | 119.4 $\pm$ 4 | 5 $\pm$ 2.5  | 0.24 $\pm$ 0.02          | 4.65 $\pm$ 0.17   | 2.4 $\pm$ 0.1                   |
| AB19-9-120 | 198.80       | 180-250                      | 65/1300                     | 61.4 $\pm$ 4.1                | 2.35 $\pm$ 0.4 | 8.86 $\pm$ 0.6  | 2.41 $\pm$ 0.04 | 111.6 $\pm$ 4 | 10 $\pm$ 2.5 | 0.19 $\pm$ 0.02          | 4.40 $\pm$ 0.17   | 14.0 $\pm$ 1.1                  |

|             |        |         |          |          |          |           |           |         |        |           |           |          |
|-------------|--------|---------|----------|----------|----------|-----------|-----------|---------|--------|-----------|-----------|----------|
| AB19-10-10  | 196.90 | 180-250 | 190/1100 | 3.7±0.3  | 1.81±0.4 | 8.40±0.6  | 2.89±0.04 | 126.4±4 | 5±2.5  | 0.27±0.03 | 4.80±0.19 | 0.8±0.1  |
| AB19-11-50  | 225.50 | 180-250 | 188/700  | 54.0±1.9 | 1.47±0.3 | 5.47±0.6  | 1.95±0.04 | 84.9±3  | 5±2.5  | 0.22±0.02 | 3.77±0.16 | 14.3±0.8 |
| AB19-11-190 | 224.10 | 180-250 | 162/600  | 58.5±1.8 | 1.92±0.4 | 7.36±0.6  | 2.98±0.04 | 134.0±4 | 5±2.5  | 0.18±0.02 | 4.90±0.19 | 11.9±0.6 |
| AB19-12-80  | 220.20 | 180-250 | 103/1100 | 15.0±1.1 | 2.16±0.4 | 8.71±0.6  | 2.54±0.04 | 122.4±4 | 5±2.5  | 0.19±0.02 | 4.66±0.18 | 3.2±0.3  |
| AB19-12-190 | 219.10 | 180-250 | 83/700   | 16.7±1.1 | 2.10±0.4 | 8.19±0.6  | 2.75±0.04 | 128.7±4 | 5±2.5  | 0.17±0.02 | 4.78±0.18 | 3.5±0.3  |
| AB19-12-545 | 215.55 | 180-250 | 169/600  | 59.1±2.5 | 2.24±0.4 | 8.40±0.6  | 2.83±0.04 | 135.2±4 | 5±2.5  | 0.12±0.01 | 4.85±0.19 | 12.2±0.7 |
| AB19-13-10  | 229.90 | 180-250 | 119/1300 | 52.0±2.6 | 5.45±0.5 | 13.12±0.7 | 2.27±0.04 | 116.1±4 | 5±2.5  | 0.27±0.03 | 5.29±0.21 | 9.8±0.7  |
| AB19-13-75  | 229.25 | 180-250 | 52/200   | 43.5±3.8 | 2.53±0.4 | 8.49±0.6  | 3.06±0.04 | 114.6±4 | 5±2.5  | 0.2±0.02  | 5.21±0.19 | 8.4±0.8  |
| JH19-1-113  | 203.87 | 180-250 | 169/800  | 10.4±0.3 | 1.3±0.3  | 5.88±0.6  | 2.82±0.04 | 135.2±4 | 5±2.5  | 0.19±0.02 | 4.66±0.18 | 2.2±0.1  |
| JH19-1-133  | 203.67 | 180-250 | 175/700  | 9.0±0.3  | 1.38±0.3 | 7.26±0.6  | 2.71±0.04 | 136.7±4 | 5±2.5  | 0.18±0.02 | 4.54±0.17 | 2.0±0.1  |
| JH19-2-120  | 222.80 | 180-250 | 106/500  | 50.2±2.6 | 1.56±0.3 | 5.69±0.6  | 2.55±0.04 | 114.9±4 | 5±2.5  | 0.19±0.02 | 4.33±0.17 | 11.6±0.8 |
| JH19-2-205  | 221.95 | 180-250 | 165/600  | 47.6±1.2 | 1.78±0.3 | 5.85±0.6  | 2.41±0.04 | 96.9±4  | 5±2.5  | 0.17±0.02 | 4.24±0.17 | 11.2±0.5 |
| JH19-3-120  | 219.80 | 180-250 | 128/600  | 11.5±0.5 | 3.01±0.4 | 6.29±0.6  | 2.35±0.04 | 101.0±4 | 5±2.5  | 0.19±0.02 | 4.50±0.17 | 2.6±0.1  |
| JH19-3-170  | 219.30 | 150-180 | 140/800  | 11.2±0.2 | 2.56±0.4 | 4.97±0.5  | 2.70±0.04 | 120.4±4 | 5±2.5  | 0.18±0.02 | 4.45±0.16 | 2.5±0.1  |
| JH19-3-360  | 217.40 | 180-250 | 92/1000  | 9.0±0.4  | 1.79±0.3 | 4.75±0.5  | 2.28±0.04 | 101.4±4 | 5±2.5  | 0.14±0.01 | 4.02±0.16 | 2.3±0.1  |
| JH19-4-70   | 207.30 | 150-180 | 125/800  | 8.8±0.3  | 1.62±0.3 | 5.62±0.6  | 2.44±0.04 | 98.3±3  | 5±2.5  | 0.2±0.02  | 4.07±0.14 | 2.2±0.1  |
| JH19-4-100  | 207.00 | 150-180 | 121/600  | 9.8±0.2  | 2.46±0.4 | 6.89±0.6  | 2.13±0.04 | 93.1±4  | 5±2.5  | 0.19±0.02 | 4.03±0.15 | 2.4±0.1  |
| JH19-4-140  | 206.60 | 150-180 | 126/500  | 45.3±3.5 | 1.98±0.4 | 7.92±0.6  | 2.18±0.04 | 97.6±4  | 10±2.5 | 0.19±0.02 | 3.87±0.14 | 11.7±1.0 |
| JH19-5-60   | 200.40 | 180-250 | 89/400   | 12.1±1   | 2.14±0.4 | 9.78±0.6  | 2.35±0.04 | 115.4±4 | 5±2.5  | 0.21±0.02 | 4.56±0.18 | 2.6±0.2  |
| JH19-5-100  | 200.00 | 180-250 | 165/600  | 57.7±2.7 | 1.49±0.3 | 5.84±0.6  | 2.81±0.04 | 128.4±4 | 10±2.5 | 0.19±0.02 | 4.39±0.16 | 13.2±0.8 |
| JH19-5-200  | 199.00 | 180-250 | 163/600  | 55.1±2.7 | 1.45±0.3 | 5.72±0.6  | 2.64±0.04 | 126.0±4 | 10±2.5 | 0.17±0.02 | 4.20±0.16 | 13.1±0.8 |
| JH19-6-55   | 202.45 | 180-250 | 54/400   | 10.4±0.9 | 1.41±0.3 | 5.32±0.6  | 2.75±0.04 | 131.8±4 | 5±2.5  | 0.21±0.02 | 4.48±0.17 | 2.3±0.2  |
| JH19-6-105  | 201.95 | 180-250 | 67/400   | 8.8±0.8  | 1.79±0.3 | 6.50±0.6  | 2.55±0.04 | 123.7±4 | 5±2.5  | 0.19±0.02 | 4.43±0.17 | 2.0±0.2  |
| JH19-6-135  | 201.65 | 150-180 | 151/600  | 9.3±0.9  | 1.49±0.3 | 5.94±0.6  | 2.69±0.04 | 133.7±4 | 5±2.5  | 0.19±0.02 | 4.28±0.14 | 2.2±0.2  |
| JH19-6-170  | 201.30 | 150-180 | 191/800  | 59.4±2.1 | 1.72±0.3 | 6.96±0.6  | 2.44±0.04 | 117.4±4 | 10±2.5 | 0.18±0.02 | 3.99±0.14 | 14.9±0.7 |
